# Supplementary material
Source: publisher figshare collection journal article supplement (https://diabetesjournals.figshare.com/articles/dataset/_/24194397)
Supplement: Supplementary file 1 [file 1]

Supplemental Table 1: Age-adjusted trends in proportions of U.S. adults overall and by subgroup with diabetes that report receiving six recommended care services - at least one dental visit, one dilated eye exam, one foot exam, two or more A1C tests, cholesterol level tested, and receiving an influenza vaccine.

|                                              | Average<br>(SE)* | 2008<br>(SE)  | 2009<br>(SE)  | 2010<br>(SE)  | 2011<br>(SE)  | 2012<br>(SE)  | 2013<br>(SE)  | 2014<br>(SE)  | 2015<br>(SE)  | 2016<br>(SE)  | 2017<br>(SE)  | 2018<br>(SE)  | 2019<br>(SE)  | 2020<br>(SE)  | Percent<br>Change<br>(95%<br>CI)*,† | Joinpoint<br>Year‡ | APC<br>(95%<br>CI)§                               | AA<br>PC<br>(95%<br>CI)*,<br> |
|----------------------------------------------|------------------|---------------|---------------|---------------|---------------|---------------|---------------|---------------|---------------|---------------|---------------|---------------|---------------|---------------|-------------------------------------|--------------------|---------------------------------------------------|-------------------------------|
| Cholesterol tested                           |                  |               |               |               |               |               |               |               |               |               |               |               |               |               |                                     |                    |                                                   |                               |
| Overall                                      | 84.4<br>(1.3)    | 82.7<br>(1.9) | 84.3<br>(1.8) | 87.8<br>(1.3) | 89.0<br>(1.4) | 84.9<br>(1.6) | 85.9<br>(1.7) | 85.9<br>(1.8) | 89.9<br>(1.5) | 89.3<br>(1.6) | 77.0<br>(1.8) | 79.7<br>(1.7) | 76.8<br>(2.6) | 71.1<br>(3.1) | -7.1<br>(-14.5,<br>0.4)             |                    | -0.7<br>(-1.6,<br>0.2)                            | -0.7<br>(-1.6,<br>0.2)        |
| Age: 18 to 44                                | 78.3<br>(1.4)    | 73.7<br>(3.4) | 77.2<br>(3.2) | 82.9<br>(2.4) | 84.0<br>(2.6) | 78.6<br>(2.9) | 79.8<br>(3.4) | 78.8<br>(3.3) | 84.8<br>(2.8) | 83.6<br>(3.0) | 70.2<br>(3.3) | 75.9<br>(3.1) | 69.9<br>(4.7) | 62.5<br>(5.7) | -5.2<br>(-20.2,<br>9.9)             |                    | -0.6<br>(-1.8,<br>0.6)                            | -0.6<br>(-1.8,<br>0.6)        |
| Age: 45 to 64                                | 90.0<br>(1.3)    | 91.6<br>(1.1) | 91.0<br>(1.1) | 92.6<br>(0.9) | 93.9<br>(0.7) | 90.2<br>(1.1) | 90.7<br>(1.1) | 93.2<br>(1.1) | 94.1<br>(0.9) | 94.9<br>(0.7) | 83.2<br>(1.5) | 82.0<br>(1.9) | 82.0<br>(1.9) | 78.3<br>(2.2) | -10.5<br>(-15.2,<br>-5.8)           | 2016               | 0.1<br>(-0.5,<br>0.6),<br>-4.8<br>(-7.3,<br>-2.4) | -1.3<br>(-2.0,<br>-0.6)       |
| Age: 65 to 74                                | 93.9<br>(1.0)    | 94.6<br>(1.4) | 94.1<br>(1.5) | 96.2<br>(1.1) | 94.9<br>(1.6) | 96.6<br>(1.1) | 95.1<br>(1.2) | 94.7<br>(1.4) | 97.6<br>(0.8) | 96.9<br>(0.8) | 87.7<br>(1.7) | 87.5<br>(1.4) | 90.6<br>(1.5) | 85.9<br>(1.9) | -4.2<br>(-8.3,<br>0.0)              |                    | -0.6<br>(-1.2,<br>0.0)                            | -0.6<br>(-1.2,<br>0.0)        |
| Age: 75+                                     | 93.9<br>(1.2)    | 95.5<br>(1.4) | 94.7<br>(1.5) | 92.6<br>(1.7) | 97.2<br>(1.0) | 94.1<br>(1.6) | 98.1<br>(0.7) | 95.7<br>(1.3) | 98.6<br>(0.6) | 97.9<br>(0.8) | 86.4<br>(1.9) | 87.6<br>(1.7) | 88.0<br>(2.1) | 83.9<br>(2.4) | -7.8<br>(-12.8,<br>-2.8)            |                    | -0.7<br>(-1.4,<br>0.1)                            | -0.7<br>(-1.4,<br>0.1)        |
| Highest degree earned: Less than high school | 80.4<br>(2.2)    | 77.7<br>(4.2) | 81.7<br>(4.3) | 83.2<br>(3.1) | 86.6<br>(2.5) | 79.0<br>(5.0) | 87.6<br>(2.3) | 88.0<br>(2.8) | 86.0<br>(3.7) | 88.0<br>(3.1) | 72.1<br>(3.5) | 71.1<br>(4.6) | 63.5<br>(5.6) | 56.8<br>(7.0) | -18.2<br>(-34.9,<br>-1.5)           | 2016               | 1.0<br>(-0.4,<br>10.4)<br>(-15.8,<br>-4.6)        | -2.3<br>(-3.8,<br>-0.6)       |

|                                                 | Average<br>(SE)* | 2008<br>(SE)   | 2009<br>(SE)   | 2010<br>(SE)   | 2011<br>(SE)  | 2012<br>(SE)  | 2013<br>(SE)  | 2014<br>(SE)  | 2015<br>(SE)  | 2016<br>(SE)  | 2017<br>(SE)  | 2018<br>(SE)  | 2019<br>(SE)   | 2020<br>(SE)   | Percent<br>Change<br>(95%<br>CI)*,† | Joinpoint<br>Year‡ | APC<br>(95%<br>CI)*,<br>§            | AA<br>PC<br>(95%<br>CI)*,<br> |
|-------------------------------------------------|------------------|----------------|----------------|----------------|---------------|---------------|---------------|---------------|---------------|---------------|---------------|---------------|----------------|----------------|-------------------------------------|--------------------|--------------------------------------|-------------------------------|
| Highest degree earned: High school              | 84.4<br>(1.3)    | 79.6<br>(3.0)  | 83.7<br>(2.8)  | 89.4<br>(1.7)  | 88.9<br>(2.1) | 87.2<br>(2.6) | 85.9<br>(2.7) | 88.1<br>(2.5) | 84.1<br>(4.7) | 88.0<br>(2.8) | 73.9<br>(3.0) | 80.7<br>(2.7) | 84.0<br>(2.5)  | 72.4<br>(4.5)  | 5.6 (-4.4, 15.6)                    |                    | -0.4<br>(-1.5, 0.6)                  | -0.4<br>(-1.5, 0.6)           |
| Highest degree earned: Greater than high school | 87.1<br>(1.3)    | 92.9<br>(1.9)  | 87.9<br>(3.1)  | 88.9<br>(2.9)  | 91.5<br>(2.6) | 86.1<br>(4.3) | 84.6<br>(4.1) | 81.4<br>(4.3) | 90.9<br>(4.9) | 92.7<br>(2.4) | 85.3<br>(2.6) | 84.2<br>(2.5) | 78.4<br>(4.2)  | 76.1<br>(4.8)  | -15.6 (-25.1, -6.1)                 |                    | -0.8<br>(-1.7, 0.0)                  | -0.8<br>(-1.7, 0.0)           |
| Race/Ethnicity: Hispanic                        | 79.9<br>(3.4)    | 88.3<br>(7.4)  | 75.8<br>(11.8) | 51.1<br>(17.6) | 93.8<br>(5.5) | 83.7<br>(2.5) | 82.2<br>(2.9) | 87.7<br>(2.5) | 91.1<br>(1.8) | 89.8<br>(2.1) | 70.7<br>(4.0) | 73.1<br>(4.3) | 71.8<br>(5.1)  | 59.1<br>(6.9)  | -18.6 (-36.1, -1.1)                 |                    | -0.1<br>(-3.3, 3.3)                  | -0.1<br>(-3.3, 3.3)           |
| Race/Ethnicity: Black/not Hispanic              | 84.2<br>(2.0)    | 80.9<br>(3.6)  | 85.5<br>(3.1)  | 83.8<br>(3.1)  | 91.3<br>(2.5) | 77.8<br>(3.5) | 89.4<br>(2.4) | 93.2<br>(2.3) | 89.8<br>(3.2) | 91.2<br>(3.3) | 71.8<br>(3.8) | 74.1<br>(5.0) | 81.9<br>(4.2)  | 75.6<br>(6.9)  | 1.2 (-12.3, 14.7)                   |                    | -0.6<br>(-2.2, 1.0)                  | -0.6<br>(-2.2, 1.0)           |
| Race/Ethnicity: Asian/not Hispanic              | 89.3<br>(2.3)    | 82.0<br>(11.5) | 96.9<br>(1.5)  | 91.6<br>(3.6)  | 86.3<br>(6.8) | 91.2<br>(5.3) | 95.1<br>(2.1) | 87.5<br>(5.6) | 96.9<br>(1.5) | 97.0<br>(1.7) | 84.9<br>(6.9) | 94.4<br>(2.9) | 68.3<br>(16.1) | 53.0<br>(14.4) | -16.8 (-61.5, 28.0)                 |                    | -0.7<br>(-2.6, 1.2)                  | -0.7<br>(-2.6, 1.2)           |
| Race/Ethnicity: White/not Hispanic              | 85.2<br>(1.0)    | 82.5<br>(2.4)  | 83.1<br>(2.2)  | 89.5<br>(1.5)  | 89.2<br>(1.7) | 88.2<br>(2.4) | 84.9<br>(2.7) | 84.1<br>(3.0) | 88.7<br>(2.6) | 88.7<br>(2.4) | 81.3<br>(2.6) | 83.4<br>(2.4) | 79.2<br>(3.4)  | 76.9<br>(4.2)  | -4.1 (-13.8, 5.6)                   |                    | -0.4<br>(-1.1, 0.4)                  | -0.4<br>(-1.1, 0.4)           |
| Sex: Male                                       | 85.3<br>(1.6)    | 80.8<br>(2.9)  | 84.8<br>(3.0)  | 88.2<br>(2.1)  | 90.9<br>(1.7) | 85.8<br>(2.1) | 85.3<br>(2.9) | 89.3<br>(2.1) | 92.9<br>(1.5) | 92.5<br>(1.4) | 79.6<br>(2.5) | 78.7<br>(2.7) | 75.0<br>(3.7)  | 71.2<br>(3.8)  | -7.2 (-18.3, 3.9)                   | 2016               | 1.0<br>(-0.1, -6.9)<br>(-11.7, -1.8) | -1.2<br>(-2.6, 0.2)           |
| Sex: Female                                     | 83.7<br>(1.1)    | 84.4<br>(2.4)  | 83.8<br>(2.5)  | 87.4<br>(2.0)  | 87.2<br>(2.1) | 84.0<br>(2.3) | 86.6<br>(2.3) | 83.0<br>(2.9) | 87.3<br>(2.6) | 86.5<br>(2.7) | 74.5<br>(2.5) | 80.7<br>(2.4) | 78.8<br>(3.1)  | 71.0<br>(4.3)  | -6.6 (-15.6, 2.3)                   |                    | -0.8<br>(-1.5, 0.0)                  | -0.8<br>(-1.5, 0.0)           |
| Insurance coverage: Private only                | 86.5<br>(1.1)    | 84.0<br>(2.5)  | 87.9<br>(2.2)  | 92.0<br>(1.5)  | 90.1<br>(2.3) | 86.1<br>(2.2) | 88.0<br>(2.7) | 83.6<br>(3.1) | 90.2<br>(2.3) | 90.9<br>(2.1) | 82.3<br>(2.6) | 84.2<br>(2.3) | 79.0<br>(3.5)  | 75.2<br>(4.6)  | -5.9 (-15.7, 3.8)                   |                    | -0.6<br>(-1.4, 0.2)                  | -0.6<br>(-1.4, 0.2)           |

[illegible]

|                                                             | Average<br>(SE)* | 2008<br>(SE)  | 2009<br>(SE)  | 2010<br>(SE)  | 2011<br>(SE)  | 2012<br>(SE)  | 2013<br>(SE)  | 2014<br>(SE)  | 2015<br>(SE)  | 2016<br>(SE)  | 2017<br>(SE)  | 2018<br>(SE)  | 2019<br>(SE)  | 2020<br>(SE)  | Percent<br>Change<br>(95%<br>CI)*,† | Joinpoint<br>Year‡ | APC<br>(95%<br>CI)*,<br>§                                                              | AA<br>PC<br>(95%<br>CI)*,<br> |
|-------------------------------------------------------------|------------------|---------------|---------------|---------------|---------------|---------------|---------------|---------------|---------------|---------------|---------------|---------------|---------------|---------------|-------------------------------------|--------------------|----------------------------------------------------------------------------------------|-------------------------------|
| Overall                                                     | 41.8<br>(1.1)    | 33.6<br>(1.8) | 36.5<br>(2.2) | 40.5<br>(1.9) | 45.4<br>(2.1) | 47.6<br>(2.1) | 44.7<br>(2.4) | 41.0<br>(2.3) | 39.4<br>(2.0) | 43.4<br>(2.3) | 42.2<br>(2.1) | 43.1<br>(2.2) | 44.4<br>(2.7) | 42.5<br>(2.8) | 32.4<br>(11.3<br>,<br>53.5)         | 2012,<br>2015      | 9.2<br>(6.9,<br>11.6<br>, -<br>6.0<br>(-<br>12.1<br>,<br>0.6),<br>2.9<br>(0.7,<br>5.1) | 2.6<br>(1.1<br>,<br>4.2)      |
| Age: 18 to<br>44                                            | 34.0<br>(1.7)    | 20.8<br>(3.0) | 28.1<br>(3.8) | 32.2<br>(3.3) | 39.2<br>(3.7) | 43.0<br>(3.7) | 40.2<br>(4.4) | 34.1<br>(4.0) | 29.7<br>(3.3) | 36.8<br>(3.9) | 31.7<br>(3.8) | 35.1<br>(3.9) | 37.4<br>(4.9) | 32.1<br>(4.7) | 79.8<br>(11.9<br>,<br>147.8)        | 2011               | 22.1<br>(1.0,<br>47.6<br>, -<br>2.1<br>(-<br>6.1,<br>2.1)                              | 4.0<br>(-<br>1.1,<br>9.3)     |
| Age: 45 to<br>64                                            | 45.2<br>(0.6)    | 42.4<br>(2.4) | 41.2<br>(1.9) | 44.9<br>(2.0) | 47.1<br>(1.9) | 45.8<br>(2.1) | 44.2<br>(2.2) | 44.2<br>(2.2) | 46.1<br>(2.1) | 45.3<br>(2.2) | 50.0<br>(2.0) | 46.7<br>(2.0) | 44.6<br>(2.3) | 48.7<br>(2.8) | 5.4 (-<br>10.5,<br>21.2)            |                    | 0.8<br>(0.0,<br>1.6)                                                                   | 0.8<br>(0.0<br>,<br>1.6)      |
| Age: 65 to<br>74                                            | 57.8<br>(0.9)    | 57.9<br>(2.9) | 53.0<br>(3.0) | 58.3<br>(3.5) | 57.0<br>(2.9) | 60.7<br>(2.7) | 57.3<br>(2.8) | 58.3<br>(2.5) | 53.0<br>(2.9) | 55.9<br>(2.8) | 57.5<br>(2.5) | 58.8<br>(2.0) | 65.7<br>(2.4) | 67.1<br>(2.6) | 13.5<br>(-0.3,<br>27.3)             |                    | 0.6<br>(-<br>0.4,<br>1.6)                                                              | 0.6<br>(-<br>0.4,<br>1.6)     |
| Age: 75+                                                    | 62.8<br>(1.3)    | 57.7<br>(3.5) | 55.6<br>(3.6) | 59.6<br>(3.3) | 67.4<br>(3.4) | 69.3<br>(3.2) | 62.2<br>(3.2) | 55.2<br>(3.6) | 62.9<br>(3.3) | 66.4<br>(2.9) | 65.3<br>(3.0) | 65.3<br>(3.0) | 66.1<br>(2.9) | 60.7<br>(3.6) | 14.5<br>(-2.1,<br>31.1)             |                    | 1.1<br>(-<br>0.2,<br>2.4)                                                              | 1.1<br>(-<br>0.2,<br>2.4)     |
| Highest<br>degree<br>earned:<br>Less than<br>high<br>school | 36.9<br>(1.8)    | 29.4<br>(2.9) | 27.2<br>(2.7) | 31.5<br>(3.0) | 46.3<br>(3.8) | 46.9<br>(5.0) | 40.9<br>(3.4) | 35.0<br>(3.3) | 37.1<br>(6.4) | 41.1<br>(3.6) | 41.8<br>(4.7) | 31.7<br>(3.8) | 33.2<br>(4.5) | 29.3<br>(4.7) | 13.1<br>(-<br>24.3,<br>50.4)        | 2012               | 13.3<br>(-<br>0.8,<br>29.4<br>, -<br>4.0<br>(-<br>9.2,<br>1.5)                         | 2.0<br>(-<br>3.0,<br>7.2)     |

|                                                 | Average<br>(SE)* | 2008<br>(SE)  | 2009<br>(SE)  | 2010<br>(SE)   | 2011<br>(SE)   | 2012<br>(SE)  | 2013<br>(SE)  | 2014<br>(SE)  | 2015<br>(SE)  | 2016<br>(SE)  | 2017<br>(SE)  | 2018<br>(SE)   | 2019<br>(SE)   | 2020<br>(SE)   | Percent<br>Change<br>(95%<br>CI)*,† | Joinpoint<br>Year‡ | APC<br>(95%<br>CI)*,<br>§                                     | AA<br>PC<br>(95%<br>CI)*,<br> |
|-------------------------------------------------|------------------|---------------|---------------|----------------|----------------|---------------|---------------|---------------|---------------|---------------|---------------|----------------|----------------|----------------|-------------------------------------|--------------------|---------------------------------------------------------------|-------------------------------|
| Highest degree earned: High school              | 40.1<br>(0.9)    | 32.1<br>(2.6) | 40.8<br>(3.6) | 41.6<br>(3.0)  | 41.4<br>(3.1)  | 42.8<br>(3.7) | 40.3<br>(4.1) | 40.4<br>(3.4) | 35.9<br>(3.7) | 42.3<br>(2.8) | 39.9<br>(2.9) | 40.6<br>(3.2)  | 43.7<br>(3.8)  | 36.6<br>(4.1)  | 36.2<br>(4.6, 67.8)                 |                    | 0.9<br>(-0.6, 2.5)                                            | 0.9<br>(-0.6, 2.5)            |
| Highest degree earned: Greater than high school | 48.9<br>(1.7)    | 40.1<br>(4.0) | 37.4<br>(4.1) | 45.6<br>(3.8)  | 52.0<br>(4.1)  | 59.4<br>(6.3) | 54.2<br>(4.4) | 46.3<br>(4.3) | 50.2<br>(7.0) | 47.3<br>(5.1) | 46.3<br>(4.2) | 53.8<br>(4.1)  | 53.8<br>(4.7)  | 58.1<br>(4.8)  | 34.0<br>(-0.8, 68.7)                |                    | 1.9<br>(-0.3, 4.2)                                            | 1.9<br>(-0.3, 4.2)            |
| Race/Ethnicity: Hispanic                        | 33.4<br>(1.9)    | 23.9<br>(9.8) | 19.8<br>(9.5) | 28.9<br>(14.6) | 47.5<br>(18.5) | 35.4<br>(3.4) | 34.8<br>(3.5) | 32.9<br>(4.7) | 35.1<br>(3.6) | 35.2<br>(3.3) | 35.2<br>(3.7) | 34.5<br>(3.7)  | 38.0<br>(5.5)  | 26.8<br>(5.0)  | 59.2<br>(-76.9, 195.4)              |                    | 3.5<br>(-0.2, 7.4)                                            | 3.5<br>(-0.2, 7.4)            |
| Race/Ethnicity: Black/not Hispanic              | 31.2<br>(1.2)    | 24.4<br>(3.4) | 29.0<br>(3.9) | 32.9<br>(3.7)  | 37.8<br>(3.7)  | 33.3<br>(3.7) | 29.6<br>(3.4) | 27.8<br>(3.5) | 30.1<br>(3.1) | 27.3<br>(3.4) | 29.6<br>(3.6) | 40.3<br>(5.9)  | 32.2<br>(5.1)  | 37.9<br>(7.9)  | 32.2<br>(-22.6, 87.0)               |                    | 1.2<br>(-1.4, 3.8)                                            | 1.2<br>(-1.4, 3.8)            |
| Race/Ethnicity: Asian/not Hispanic              | 40.2<br>(2.1)    | 30.6<br>(6.9) | 30.2<br>(5.9) | 36.6<br>(7.2)  | 40.3<br>(8.1)  | 43.5<br>(8.6) | 42.5<br>(6.4) | 43.4<br>(7.6) | 30.3<br>(6.4) | 56.2<br>(8.3) | 37.4<br>(8.3) | 47.0<br>(11.8) | 44.7<br>(13.6) | 59.1<br>(14.0) | 46.0<br>(-62.3, 154.3)              |                    | 3.2<br>(0.0, 6.4)                                             | 3.2<br>(0.0, 6.4)             |
| Race/Ethnicity: White/not Hispanic              | 47.3<br>(1.7)    | 35.4<br>(2.3) | 39.0<br>(2.8) | 42.4<br>(2.4)  | 47.6<br>(2.7)  | 56.9<br>(3.0) | 53.4<br>(3.4) | 46.8<br>(3.3) | 45.3<br>(3.0) | 50.1<br>(3.3) | 50.1<br>(3.4) | 48.3<br>(2.6)  | 51.7<br>(3.6)  | 48.1<br>(3.7)  | 45.9<br>(18.6, 73.2)                | 2012, 2015         | 12.2<br>(8.9, 15.7), -5.6<br>(-14.3, 3.9), 2.7<br>(-0.4, 5.9) | 3.7<br>(1.5, 5.9)             |

|                                            | Average<br>(SE)* | 2008<br>(SE)  | 2009<br>(SE)  | 2010<br>(SE)  | 2011<br>(SE)  | 2012<br>(SE)  | 2013<br>(SE)  | 2014<br>(SE)  | 2015<br>(SE)  | 2016<br>(SE)  | 2017<br>(SE)  | 2018<br>(SE)  | 2019<br>(SE)  | 2020<br>(SE)  | Percent<br>Change<br>(95%<br>CI)*,† | Joinpoint<br>Year‡ | APC<br>(95%<br>CI)*,<br>§                                                       | AA<br>PC<br>(95%<br>CI)*,<br> |
|--------------------------------------------|------------------|---------------|---------------|---------------|---------------|---------------|---------------|---------------|---------------|---------------|---------------|---------------|---------------|---------------|-------------------------------------|--------------------|---------------------------------------------------------------------------------|-------------------------------|
| Sex: Male                                  | 41.9<br>(1.1)    | 33.7<br>(2.9) | 37.4<br>(2.7) | 42.5<br>(2.9) | 46.9<br>(3.0) | 47.6<br>(3.0) | 45.7<br>(3.4) | 43.0<br>(3.3) | 38.9<br>(2.9) | 41.8<br>(3.1) | 39.2<br>(2.7) | 43.7<br>(3.3) | 42.4<br>(3.6) | 41.8<br>(3.7) | 25.8<br>(-4.0,<br>55.7)             | 2011               | 11.0<br>(0.6,<br>22.5), -<br>1.7<br>(-3.8,<br>0.4)                              | 1.6<br>(-1.0,<br>4.3)         |
| Sex:<br>Female                             | 41.7<br>(1.2)    | 33.4<br>(2.3) | 35.6<br>(3.1) | 38.7<br>(2.5) | 43.9<br>(2.9) | 47.5<br>(2.6) | 43.7<br>(3.2) | 39.2<br>(2.7) | 39.7<br>(2.9) | 44.9<br>(3.1) | 45.0<br>(3.0) | 42.5<br>(2.7) | 46.6<br>(3.3) | 43.2<br>(3.9) | 39.3<br>(12.2,<br>66.5)             |                    | 2.0<br>(0.4,<br>3.7)                                                            | 2.0<br>(0.4,<br>3.7)          |
| Insurance<br>coverage:<br>Private<br>only  | 43.5<br>(1.6)    | 30.5<br>(2.7) | 38.7<br>(3.8) | 44.4<br>(3.3) | 44.9<br>(3.4) | 51.8<br>(3.6) | 49.2<br>(4.1) | 43.4<br>(4.0) | 39.0<br>(3.1) | 43.0<br>(3.6) | 44.2<br>(3.4) | 44.1<br>(3.4) | 49.0<br>(4.3) | 44.7<br>(4.1) | 60.6<br>(21.8,<br>99.5)             | 2012,<br>2015      | 13.1<br>(4.7,<br>22.1), -<br>9.2<br>(-28.8,<br>15.8),<br>4.9<br>(-2.9,<br>13.3) | 3.7<br>(-1.8,<br>9.5)         |
| Insurance<br>coverage:<br>Medicaid         | 35.0<br>(1.4)    | 34.9<br>(3.8) | 28.0<br>(3.7) | 30.5<br>(4.0) | 46.6<br>(4.7) | 37.8<br>(4.4) | 37.3<br>(4.6) | 32.9<br>(3.9) | 33.0<br>(3.9) | 39.7<br>(4.8) | 34.8<br>(4.0) | 34.6<br>(4.0) | 30.1<br>(4.5) | 29.4<br>(4.3) | -13.8<br>(-45.0,<br>17.5)           |                    | -0.1<br>(-2.7,<br>2.7)                                                          | -0.1<br>(-2.7,<br>2.7)        |
| Insurance<br>coverage:<br>Uninsured        | 23.0<br>(1.1)    | 19.2<br>(5.6) | 17.9<br>(3.7) | 24.5<br>(4.7) | 22.6<br>(4.3) | 29.8<br>(4.6) | 25.2<br>(5.2) | 25.2<br>(7.1) | 18.7<br>(5.2) | 28.0<br>(4.7) | 24.6<br>(7.9) | 20.6<br>(6.4) | 19.7<br>(8.7) | 21.7<br>(9.2) | 2.6 (-<br>103.3,<br>108.4)          |                    | 0.4<br>(-2.8,<br>3.8)                                                           | 0.4<br>(-2.8,<br>3.8)         |
| Insurance<br>coverage:<br>Medicare<br>only | 57.6<br>(0.9)    | 53.5<br>(2.5) | 53.2<br>(2.8) | 55.1<br>(2.7) | 60.5<br>(2.7) | 60.1<br>(2.6) | 57.1<br>(2.5) | 53.6<br>(2.7) | 59.7<br>(2.5) | 57.1<br>(2.9) | 57.2<br>(2.5) | 59.4<br>(2.3) | 64.4<br>(2.3) | 67.0<br>(2.6) | 20.5<br>(6.5,<br>34.4)              |                    | 1.0<br>(0.1,<br>1.9)                                                            | 1.0<br>(0.1,<br>1.9)          |

|                                              | Average<br>(SE)* | 2008<br>(SE)  | 2009<br>(SE)  | 2010<br>(SE)  | 2011<br>(SE)  | 2012<br>(SE)  | 2013<br>(SE)  | 2014<br>(SE)  | 2015<br>(SE)  | 2016<br>(SE)  | 2017<br>(SE)  | 2018<br>(SE)  | 2019<br>(SE)  | 2020<br>(SE)  | Percent<br>Change<br>(95%<br>CI)*,† | Joinpoint<br>Year‡ | APC<br>(95%<br>CI)*,<br>§                                       | AA<br>PC<br>(95%<br>CI)*,<br> |
|----------------------------------------------|------------------|---------------|---------------|---------------|---------------|---------------|---------------|---------------|---------------|---------------|---------------|---------------|---------------|---------------|-------------------------------------|--------------------|-----------------------------------------------------------------|-------------------------------|
| Poverty<br>income<br>ratio: ><br>400%        | 50.2<br>(1.8)    | 39.0<br>(4.0) | 41.0<br>(3.8) | 50.2<br>(4.0) | 49.0<br>(4.3) | 58.5<br>(4.0) | 59.6<br>(4.3) | 46.9<br>(4.2) | 45.6<br>(3.9) | 48.2<br>(4.4) | 53.7<br>(4.3) | 55.2<br>(4.0) | 55.6<br>(4.9) | 53.7<br>(5.1) | 42.6<br>(4.9, 80.3)                 | 2012,<br>2015      | 11.4<br>(4.3, 18.9), -7.8<br>(-25.1, 13.3), 5.7<br>(-1.0, 12.8) | 3.8<br>(-0.9, 8.7)            |
| Poverty<br>income<br>ratio:<br>200%—<br>399% | 40.9<br>(1.5)    | 30.1<br>(3.2) | 34.8<br>(3.1) | 35.7<br>(3.4) | 44.3<br>(3.6) | 48.0<br>(4.1) | 40.5<br>(3.7) | 43.0<br>(3.9) | 39.1<br>(3.7) | 47.5<br>(4.2) | 42.4<br>(3.9) | 41.8<br>(3.9) | 43.8<br>(5.0) | 45.6<br>(4.9) | 45.4<br>(1.0, 89.9)                 | 2011               | 13.2<br>(0.2, 27.9), -0.2<br>(-2.8, 2.5)                        | 3.3<br>(0.1, 6.7)             |
| Poverty<br>income<br>ratio:<br>100%—<br>199% | 39.0<br>(1.2)    | 35.9<br>(3.9) | 43.4<br>(5.6) | 41.8<br>(4.0) | 44.9<br>(3.0) | 42.5<br>(4.2) | 44.9<br>(4.5) | 36.2<br>(4.7) | 36.7<br>(4.6) | 37.9<br>(4.3) | 30.9<br>(3.2) | 35.8<br>(4.1) | 37.7<br>(5.6) | 27.0<br>(4.5) | 5.1 (-32.9, 43.0)                   |                    | -1.7<br>(-3.5, 0.2)                                             | -1.7<br>(-3.5, 0.2)           |
| Poverty<br>income<br>ratio: <<br>100%        | 33.6<br>(1.4)    | 26.2<br>(3.7) | 23.1<br>(3.4) | 32.9<br>(4.0) | 41.4<br>(4.6) | 37.4<br>(4.3) | 31.2<br>(4.1) | 35.7<br>(4.7) | 31.9<br>(3.9) | 34.9<br>(3.8) | 37.3<br>(4.3) | 37.1<br>(4.7) | 34.0<br>(4.0) | 30.9<br>(5.9) | 29.8<br>(-16.8, 76.5)               |                    | 2.4<br>(-0.3, 5.2)                                              | 2.4<br>(-0.3, 5.2)            |
| One or more dentist visits                   |                  |               |               |               |               |               |               |               |               |               |               |               |               |               |                                     |                    |                                                                 |                               |
| Overall                                      | 35.7<br>(0.7)    | 37.2<br>(2.0) | 37.0<br>(2.2) | 32.8<br>(2.0) | 36.6<br>(2.4) | 32.6<br>(1.8) | 35.1<br>(2.0) | 34.6<br>(2.1) | 35.9<br>(2.0) | 32.6<br>(2.1) | 34.6<br>(2.2) | 37.9<br>(2.3) | 41.9<br>(2.7) | 32.7<br>(2.9) | 12.9<br>(-5.6, 31.3)                | 2017               | -0.7<br>(-2.2, 0.9), 11.6<br>(-6.1, 32.7)                       | 1.4<br>(-1.4, 4.3)            |

|                                              | Average<br>(SE)* | 2008<br>(SE)  | 2009<br>(SE)  | 2010<br>(SE)  | 2011<br>(SE)  | 2012<br>(SE)  | 2013<br>(SE)  | 2014<br>(SE)  | 2015<br>(SE)  | 2016<br>(SE)  | 2017<br>(SE)  | 2018<br>(SE)  | 2019<br>(SE)  | 2020<br>(SE)  | Percent<br>Change<br>(95%<br>CI)*,† | Joinpoint<br>Year‡ | APC<br>(95%<br>CI)*,<br>§ | AA<br>PC<br>(95%<br>CI)*,<br> |
|----------------------------------------------|------------------|---------------|---------------|---------------|---------------|---------------|---------------|---------------|---------------|---------------|---------------|---------------|---------------|---------------|-------------------------------------|--------------------|---------------------------|-------------------------------|
| Age: 18 to 44                                | 33.0<br>(0.8)    | 35.0<br>(3.5) | 35.3<br>(3.9) | 30.1<br>(3.6) | 37.0<br>(4.2) | 28.6<br>(3.1) | 32.9<br>(3.4) | 32.6<br>(3.6) | 32.7<br>(3.8) | 28.8<br>(3.8) | 31.1<br>(3.8) | 33.6<br>(4.2) | 38.0<br>(4.8) | 28.9<br>(5.0) | 8.5 (-25.7, 42.8)                   |                    | -0.1<br>(-1.8, 1.7)       | -0.1<br>(-1.8, 1.7)           |
| Age: 45 to 64                                | 38.3<br>(0.9)    | 42.1<br>(2.0) | 39.0<br>(2.0) | 35.7<br>(2.0) | 35.1<br>(2.2) | 37.9<br>(2.2) | 37.7<br>(2.0) | 35.3<br>(1.9) | 38.0<br>(1.9) | 34.6<br>(2.1) | 37.7<br>(2.0) | 41.2<br>(2.2) | 45.8<br>(2.4) | 34.5<br>(2.4) | 8.8 (-6.2, 23.7)                    | 2016               | -1.4<br>(-3.3, 8.9)       | 1.3<br>(-1.0, 3.7)            |
| Age: 65 to 74                                | 41.5<br>(1.4)    | 34.6<br>(3.1) | 38.9<br>(2.7) | 36.3<br>(2.9) | 37.3<br>(2.8) | 36.7<br>(2.7) | 40.3<br>(2.6) | 43.6<br>(3.0) | 44.4<br>(3.0) | 45.7<br>(3.0) | 41.8<br>(2.6) | 47.9<br>(2.5) | 50.5<br>(2.7) | 43.4<br>(2.6) | 45.8 (15.6, 76.1)                   |                    | 3.1<br>(2.1, 4.1)         | 3.1<br>(2.1, 4.1)             |
| Age: 75+                                     | 37.8<br>(0.9)    | 35.8<br>(3.2) | 37.9<br>(3.1) | 36.0<br>(3.3) | 38.4<br>(2.9) | 34.1<br>(3.1) | 35.0<br>(3.7) | 35.8<br>(3.6) | 39.1<br>(3.1) | 35.3<br>(3.0) | 38.6<br>(2.9) | 43.3<br>(2.7) | 44.2<br>(3.2) | 39.3<br>(3.4) | 23.3 (-4.3, 50.9)                   |                    | 1.4<br>(0.1, 2.7)         | 1.4<br>(0.1, 2.7)             |
| Highest degree earned: Less than high school | 24.3<br>(1.3)    | 22.7<br>(3.2) | 21.1<br>(2.7) | 17.1<br>(2.8) | 29.9<br>(4.0) | 29.4<br>(5.2) | 19.5<br>(2.6) | 20.5<br>(2.5) | 29.6<br>(6.2) | 21.7<br>(3.3) | 22.5<br>(3.0) | 28.9<br>(4.2) | 28.6<br>(5.0) | 10.6<br>(2.0) | 26.0 (-29.4, 81.4)                  |                    | 2.0<br>(-1.5, 5.7)        | 2.0<br>(-1.5, 5.7)            |
| Highest degree earned: High school           | 33.1<br>(0.9)    | 35.9<br>(2.9) | 36.3<br>(3.2) | 30.6<br>(2.6) | 31.1<br>(3.2) | 35.6<br>(3.9) | 36.0<br>(3.5) | 33.9<br>(3.3) | 29.7<br>(3.9) | 26.4<br>(2.4) | 30.3<br>(2.9) | 33.7<br>(3.2) | 37.5<br>(3.4) | 29.3<br>(4.1) | 4.5 (-20.7, 29.6)                   | 2010, 2013, 2016   | -8.8<br>(-11.3, -5.8)     | 0.1<br>(-0.1, 0.3)            |



|                                                 | Average<br>(SE)* | 2008<br>(SE)   | 2009<br>(SE)  | 2010<br>(SE)   | 2011<br>(SE)  | 2012<br>(SE)  | 2013<br>(SE)  | 2014<br>(SE)  | 2015<br>(SE)  | 2016<br>(SE)  | 2017<br>(SE)  | 2018<br>(SE)   | 2019<br>(SE)  | 2020<br>(SE)   | Percent<br>Change<br>(95%<br>CI)*,† | Joinpoint<br>Year‡ | APC<br>(95%<br>CI)*,<br>§                       | AA<br>PC<br>(95%<br>CI)*,<br> |
|-------------------------------------------------|------------------|----------------|---------------|----------------|---------------|---------------|---------------|---------------|---------------|---------------|---------------|----------------|---------------|----------------|-------------------------------------|--------------------|-------------------------------------------------|-------------------------------|
| Highest degree earned: Greater than high school | 51.5<br>(1.0)    | 52.8<br>(4.4)  | 53.0<br>(4.6) | 48.1<br>(4.0)  | 52.6<br>(4.7) | 51.0<br>(5.1) | 47.7<br>(4.1) | 46.2<br>(4.2) | 56.9<br>(5.6) | 51.9<br>(4.4) | 50.6<br>(3.8) | 49.2<br>(4.1)  | 57.6<br>(5.0) | 49.5<br>(5.0)  | 9.1 (-16.7, 34.9)                   |                    | 0.3<br>(-1.0, 1.6)                              | 0.3<br>(-1.0, 1.6)            |
| Race/Ethnicity: Hispanic                        | 27.3<br>(1.8)    | 36.5<br>(15.3) | 20.5<br>(9.6) | 38.0<br>(16.3) | 17.4<br>(9.1) | 21.6<br>(3.2) | 22.6<br>(3.1) | 28.2<br>(3.3) | 26.2<br>(3.2) | 23.8<br>(2.8) | 33.1<br>(4.1) | 29.8<br>(4.4)  | 30.0<br>(5.1) | 18.8<br>(5.5)  | -17.8 (-90.5, 54.9)                 |                    | 0.9<br>(-3.7, 5.7)                              | 0.9<br>(-3.7, 5.7)            |
| Race/Ethnicity: Black/not Hispanic              | 29.0<br>(1.2)    | 31.7<br>(4.3)  | 30.2<br>(3.6) | 31.5<br>(4.3)  | 26.2<br>(3.6) | 23.9<br>(2.9) | 36.4<br>(3.9) | 36.5<br>(5.4) | 26.1<br>(3.1) | 23.6<br>(2.6) | 24.9<br>(4.0) | 28.3<br>(4.2)  | 28.7<br>(4.7) | 40.5<br>(8.6)  | -9.4 (-47.0, 28.3)                  |                    | -1.2<br>(-4.0, 1.5)                             | -1.2<br>(-4.0, 1.5)           |
| Race/Ethnicity: Asian/not Hispanic              | 40.0<br>(3.7)    | 44.7<br>(9.0)  | 40.4<br>(9.3) | 41.6<br>(8.2)  | 28.5<br>(7.0) | 43.5<br>(8.5) | 43.3<br>(6.7) | 37.7<br>(8.6) | 28.7<br>(6.0) | 24.9<br>(5.7) | 26.8<br>(7.4) | 46.1<br>(11.7) | 74.0<br>(9.8) | 31.1<br>(12.6) | 65.7 (-12.4, 143.8)                 | 2017               | -5.3<br>(-10.4, 0.1),<br>64.5<br>(-10.4, 202.0) | 4.7<br>(-5.1, 15.6)           |
| Race/Ethnicity: White/not Hispanic              | 39.9<br>(1.0)    | 38.0<br>(2.6)  | 39.1<br>(2.8) | 32.2<br>(2.5)  | 40.0<br>(2.8) | 39.7<br>(2.9) | 39.6<br>(3.4) | 36.4<br>(3.1) | 42.6<br>(3.3) | 39.7<br>(3.4) | 41.7<br>(3.1) | 44.4<br>(3.1)  | 45.7<br>(3.6) | 35.4<br>(3.5)  | 20.2 (-4.3, 44.8)                   |                    | 1.8<br>(0.5, 3.1)                               | 1.8<br>(0.5, 3.1)             |
| Sex: Male                                       | 34.5<br>(1.0)    | 36.5<br>(2.9)  | 36.4<br>(2.7) | 31.2<br>(3.0)  | 35.7<br>(3.4) | 29.0<br>(2.4) | 34.0<br>(2.9) | 30.3<br>(3.1) | 34.0<br>(3.0) | 37.2<br>(3.3) | 32.4<br>(2.8) | 36.0<br>(2.8)  | 41.6<br>(3.7) | 32.9<br>(4.2)  | 13.8 (-13.0, 40.6)                  |                    | 0.7<br>(-1.1, 2.7)                              | 0.7<br>(-1.1, 2.7)            |
| Sex: Female                                     | 36.9<br>(0.9)    | 37.7<br>(3.0)  | 37.4<br>(3.1) | 34.3<br>(2.8)  | 37.4<br>(3.1) | 36.2<br>(2.8) | 36.2<br>(3.0) | 38.4<br>(2.8) | 37.5<br>(2.7) | 28.4<br>(2.7) | 36.7<br>(3.2) | 39.8<br>(3.1)  | 42.4<br>(3.4) | 32.6<br>(3.9)  | 12.2 (-12.7, 37.1)                  |                    | 0.4<br>(-1.5, 2.3)                              | 0.4<br>(-1.5, 2.3)            |

|                                            | Average<br>(SE)* | 2008<br>(SE)  | 2009<br>(SE)  | 2010<br>(SE)  | 2011<br>(SE)  | 2012<br>(SE)  | 2013<br>(SE)  | 2014<br>(SE)  | 2015<br>(SE)  | 2016<br>(SE)  | 2017<br>(SE)  | 2018<br>(SE)  | 2019<br>(SE)  | 2020<br>(SE)  | Percent<br>Change<br>(95%<br>CI)*,† | Joinpoint<br>Year‡     | APC<br>(95%<br>CI)*,<br>§                                                                                      | AA<br>PC<br>(95%<br>CI)*,<br> |
|--------------------------------------------|------------------|---------------|---------------|---------------|---------------|---------------|---------------|---------------|---------------|---------------|---------------|---------------|---------------|---------------|-------------------------------------|------------------------|----------------------------------------------------------------------------------------------------------------|-------------------------------|
| Insurance<br>coverage:<br>Private<br>only  | 43.0<br>(0.9)    | 46.3<br>(2.9) | 47.6<br>(3.3) | 41.4<br>(3.0) | 43.2<br>(3.8) | 40.1<br>(3.3) | 42.3<br>(3.5) | 38.6<br>(3.7) | 39.5<br>(3.6) | 40.7<br>(3.5) | 42.3<br>(3.6) | 45.3<br>(3.4) | 48.2<br>(4.2) | 38.4<br>(4.5) | 4.2 (-<br>17.9,<br>26.3)            | 2015                   | -2.6<br>(-4.3,<br>-0.9),<br>5.6<br>(1.4,<br>9.9)                                                               | 0.3<br>(-1.2,<br>1.8)         |
| Insurance<br>coverage:<br>Medicaid         | 25.5<br>(1.3)    | 24.7<br>(4.5) | 23.4<br>(3.6) | 19.4<br>(4.4) | 32.1<br>(5.7) | 22.1<br>(4.0) | 23.0<br>(3.6) | 29.2<br>(4.7) | 27.5<br>(4.5) | 19.0<br>(2.9) | 24.7<br>(4.3) | 27.8<br>(4.3) | 33.5<br>(5.7) | 20.4<br>(5.0) | 35.9<br>(-30.8,<br>102.7)           |                        | 1.7<br>(-1.6,<br>5.2)                                                                                          | 1.7<br>(-1.6,<br>5.2)         |
| Insurance<br>coverage:<br>Uninsured        | 15.9<br>(1.3)    | 18.4<br>(5.4) | 18.2<br>(6.5) | 20.4<br>(4.2) | 16.9<br>(4.4) | 13.1<br>(3.4) | 18.6<br>(5.8) | 16.3<br>(4.6) | 23.8<br>(9.8) | 9.6<br>(4.1)  | 17.5<br>(7.6) | 7.9<br>(2.8)  | 9.8<br>(7.1)  | 12.1<br>(7.1) | -46.4<br>(-128.4,<br>35.6)          |                        | -5.6<br>(-10.5,<br>-0.5)                                                                                       | -5.6<br>(-10.5,<br>-0.5)      |
| Insurance<br>coverage:<br>Medicare<br>only | 39.9<br>(1.1)    | 35.0<br>(2.6) | 35.8<br>(2.4) | 34.6<br>(2.4) | 37.4<br>(2.2) | 39.1<br>(2.4) | 43.3<br>(2.8) | 39.8<br>(2.5) | 41.4<br>(2.4) | 40.0<br>(2.5) | 39.3<br>(2.3) | 45.0<br>(2.1) | 48.1<br>(2.6) | 45.1<br>(3.0) | 37.7<br>(12.7,<br>62.6)             | 2010,<br>2013,<br>2017 | -0.5<br>(-41.7,<br>69.5),<br>6.4<br>(-37.6,<br>81.5),<br>-1.6<br>(-24.6,<br>28.5),<br>11.0<br>(-34.9,<br>89.3) | 3.0<br>(-0.5,<br>6.6)         |

|                                              | Average<br>(SE)* | 2008<br>(SE)  | 2009<br>(SE)  | 2010<br>(SE)  | 2011<br>(SE)  | 2012<br>(SE)  | 2013<br>(SE)  | 2014<br>(SE)  | 2015<br>(SE)  | 2016<br>(SE)  | 2017<br>(SE)  | 2018<br>(SE)  | 2019<br>(SE)  | 2020<br>(SE)  | Percent<br>Change<br>(95%<br>CI)*,† | Joinpoint<br>Year‡     | APC<br>(95%<br>CI)*,<br>§                                                                                                     | AA<br>PC<br>(95%<br>CI)*,<br> |
|----------------------------------------------|------------------|---------------|---------------|---------------|---------------|---------------|---------------|---------------|---------------|---------------|---------------|---------------|---------------|---------------|-------------------------------------|------------------------|-------------------------------------------------------------------------------------------------------------------------------|-------------------------------|
| Poverty<br>income<br>ratio: ><br>400%        | 50.0<br>(1.0)    | 46.3<br>(4.0) | 54.2<br>(4.3) | 47.1<br>(4.3) | 54.6<br>(4.6) | 47.2<br>(4.0) | 52.2<br>(3.7) | 48.9<br>(4.6) | 44.6<br>(4.4) | 47.7<br>(4.5) | 50.1<br>(4.2) | 52.5<br>(3.9) | 55.0<br>(4.7) | 56.5<br>(5.1) | 18.7<br>(-9.7,<br>47.1)             |                        | 0.4<br>(-1.0,<br>1.8)                                                                                                         | 0.4<br>(-1.0,<br>1.8)         |
| Poverty<br>income<br>ratio:<br>200%—<br>399% | 34.9<br>(1.4)    | 38.2<br>(3.5) | 32.9<br>(3.3) | 30.6<br>(3.3) | 29.5<br>(3.1) | 35.9<br>(3.7) | 33.5<br>(4.1) | 35.1<br>(4.0) | 33.5<br>(4.0) | 28.1<br>(3.5) | 33.8<br>(3.5) | 41.0<br>(4.1) | 47.1<br>(4.6) | 21.8<br>(3.9) | 23.2<br>(-9.4,<br>55.9)             | 2010,<br>2013,<br>2016 | -11.6<br>(-40.1,<br>,<br>30.5),<br>6.7<br>(-27.8,<br>,<br>57.5),<br>-6.4<br>(-36.6,<br>,<br>38.2),<br>17.0<br>(-3.7,<br>42.2) | 2.0<br>(-0.7,<br>4.8)         |
| Poverty<br>income<br>ratio:<br>100%—<br>199% | 27.3<br>(1.0)    | 29.0<br>(3.8) | 28.8<br>(4.9) | 27.6<br>(4.0) | 33.1<br>(4.9) | 22.9<br>(3.4) | 26.5<br>(3.9) | 23.7<br>(3.7) | 32.1<br>(4.1) | 22.8<br>(3.2) | 23.8<br>(3.7) | 27.1<br>(3.7) | 30.6<br>(5.0) | 20.0<br>(5.3) | 5.6 (-37.9,<br>49.1)                |                        | -0.7<br>(-3.1,<br>1.8)                                                                                                        | -0.7<br>(-3.1,<br>1.8)        |

|                                                             | Average<br>(SE)* | 2008<br>(SE)  | 2009<br>(SE)  | 2010<br>(SE)  | 2011<br>(SE)  | 2012<br>(SE)  | 2013<br>(SE)  | 2014<br>(SE)  | 2015<br>(SE)  | 2016<br>(SE)  | 2017<br>(SE)  | 2018<br>(SE)  | 2019<br>(SE)  | 2020<br>(SE)  | Percent<br>Change<br>(95%<br>CI)*,† | Joinpoint<br>Year‡ | APC<br>(95%<br>CI)*,<br>§                                                        | AA<br>PC<br>(95%<br>CI)*,<br> |
|-------------------------------------------------------------|------------------|---------------|---------------|---------------|---------------|---------------|---------------|---------------|---------------|---------------|---------------|---------------|---------------|---------------|-------------------------------------|--------------------|----------------------------------------------------------------------------------|-------------------------------|
| Poverty<br>income<br>ratio: <<br>100%                       | 23.8<br>(1.0)    | 28.3<br>(4.8) | 26.7<br>(4.0) | 20.5<br>(3.5) | 19.6<br>(3.9) | 18.0<br>(3.0) | 23.2<br>(4.1) | 27.0<br>(5.0) | 29.2<br>(5.4) | 23.2<br>(3.6) | 23.6<br>(4.4) | 23.5<br>(4.3) | 22.2<br>(4.0) | 17.2<br>(3.5) | -21.4<br>(-59.5,<br>16.7)           | 2011,<br>2015      | -14.3<br>(-22.3,<br>-5.4),<br>10.7<br>(0.4,<br>22.2),<br>-5.9<br>(-11.6,<br>0.1) | -2.7<br>(-6.1,<br>0.8)        |
| Two or more A1C tests                                       |                  |               |               |               |               |               |               |               |               |               |               |               |               |               |                                     |                    |                                                                                  |                               |
| Overall                                                     | 53.0<br>(0.8)    | 53.7<br>(2.3) | 49.1<br>(2.3) | 51.7<br>(2.0) | 55.4<br>(2.0) | 50.1<br>(2.3) | 48.8<br>(2.2) | 52.3<br>(2.1) | 53.6<br>(2.2) | 54.7<br>(2.1) | 52.7<br>(2.0) | 55.3<br>(2.5) | 58.3<br>(2.5) | 59.3<br>(3.0) | 8.7 (-4.3,<br>21.7)                 |                    | 0.8<br>(-0.1,<br>1.7)                                                            | 0.8<br>(-0.1,<br>1.7)         |
| Age: 18 to<br>44                                            | 49.6<br>(1.1)    | 53.9<br>(3.8) | 44.2<br>(3.9) | 49.2<br>(3.5) | 56.4<br>(3.4) | 48.0<br>(4.0) | 43.1<br>(3.8) | 50.9<br>(3.9) | 47.4<br>(3.8) | 49.3<br>(3.5) | 48.6<br>(3.6) | 50.5<br>(4.5) | 53.9<br>(4.6) | 56.8<br>(5.5) | -0.1<br>(-21.8,<br>21.7)            |                    | 0.2<br>(-1.3,<br>1.7)                                                            | 0.2<br>(-1.3,<br>1.7)         |
| Age: 45 to<br>64                                            | 56.9<br>(0.8)    | 53.9<br>(2.3) | 55.4<br>(2.1) | 54.8<br>(2.0) | 55.2<br>(2.1) | 53.7<br>(2.1) | 56.5<br>(1.8) | 53.9<br>(2.1) | 60.0<br>(2.3) | 59.1<br>(2.2) | 57.8<br>(2.0) | 60.7<br>(2.2) | 61.6<br>(2.6) | 61.9<br>(2.5) | 14.3<br>(0.9,<br>27.7)              |                    | 1.2<br>(0.6,<br>1.7)                                                             | 1.2<br>(0.6,<br>1.7)          |
| Age: 65 to<br>74                                            | 59.7<br>(1.4)    | 54.1<br>(2.9) | 56.7<br>(3.0) | 58.8<br>(3.3) | 57.0<br>(2.6) | 52.0<br>(2.7) | 58.9<br>(2.6) | 57.4<br>(2.9) | 62.2<br>(2.7) | 67.4<br>(2.6) | 58.6<br>(2.5) | 65.7<br>(2.4) | 67.9<br>(2.5) | 65.5<br>(2.6) | 25.4<br>(9.6,<br>41.3)              |                    | 1.8<br>(0.8,<br>2.9)                                                             | 1.8<br>(0.8,<br>2.9)          |
| Age: 75+                                                    | 52.9<br>(1.7)    | 50.5<br>(3.5) | 49.8<br>(3.3) | 48.7<br>(3.3) | 47.0<br>(3.0) | 48.3<br>(3.5) | 46.1<br>(3.2) | 49.8<br>(3.0) | 61.0<br>(2.9) | 59.8<br>(3.1) | 53.7<br>(3.2) | 55.3<br>(3.6) | 64.7<br>(2.9) | 59.0<br>(3.4) | 27.9<br>(7.1,<br>48.7)              |                    | 2.2<br>(0.7,<br>3.8)                                                             | 2.2<br>(0.7,<br>3.8)          |
| Highest<br>degree<br>earned:<br>Less than<br>high<br>school | 42.4<br>(1.3)    | 40.4<br>(3.8) | 41.4<br>(4.1) | 34.8<br>(3.1) | 44.3<br>(3.7) | 45.0<br>(4.8) | 37.4<br>(2.8) | 35.8<br>(2.9) | 41.2<br>(6.1) | 46.9<br>(3.5) | 48.0<br>(4.1) | 49.6<br>(5.0) | 44.6<br>(4.7) | 44.6<br>(6.4) | 10.3<br>(-20.1,<br>40.8)            |                    | 1.7<br>(-0.2,<br>3.7)                                                            | 1.7<br>(-0.2,<br>3.7)         |

|                                                 | Average<br>(SE)* | 2008<br>(SE)   | 2009<br>(SE)  | 2010<br>(SE)   | 2011<br>(SE)   | 2012<br>(SE)  | 2013<br>(SE)  | 2014<br>(SE)  | 2015<br>(SE)  | 2016<br>(SE)  | 2017<br>(SE)  | 2018<br>(SE)   | 2019<br>(SE)   | 2020<br>(SE)  | Percent<br>Change<br>(95%<br>CI)*,† | Joinpoint<br>Year‡ | APC<br>(95%<br>CI)*,<br>§ | AA<br>PC<br>(95%<br>CI)*,<br> |
|-------------------------------------------------|------------------|----------------|---------------|----------------|----------------|---------------|---------------|---------------|---------------|---------------|---------------|----------------|----------------|---------------|-------------------------------------|--------------------|---------------------------|-------------------------------|
| Highest degree earned: High school              | 52.0<br>(0.7)    | 54.1<br>(3.4)  | 48.0<br>(3.0) | 51.8<br>(2.9)  | 53.7<br>(3.2)  | 48.9<br>(4.0) | 49.9<br>(3.7) | 52.4<br>(3.8) | 49.4<br>(4.1) | 54.1<br>(3.0) | 50.5<br>(3.0) | 54.9<br>(3.7)  | 55.7<br>(3.4)  | 60.9<br>(4.4) | 3.0 (-14.8, 20.8)                   |                    | 0.5<br>(-0.4, 1.4)        | 0.5<br>(-0.4, 1.4)            |
| Highest degree earned: Greater than high school | 62.8<br>(1.1)    | 64.5<br>(4.1)  | 58.5<br>(4.7) | 64.5<br>(3.8)  | 68.0<br>(3.6)  | 61.5<br>(6.3) | 57.3<br>(4.2) | 64.2<br>(4.6) | 61.3<br>(6.5) | 62.1<br>(4.6) | 59.8<br>(4.0) | 59.6<br>(3.4)  | 71.7<br>(3.8)  | 65.6<br>(4.6) | 11.1 (-6.8, 29.0)                   |                    | 0.2<br>(-1.1, 1.4)        | 0.2<br>(-1.1, 1.4)            |
| Race/Ethnicity: Hispanic                        | 39.6<br>(2.9)    | 32.2<br>(11.6) | 16.1<br>(8.7) | 42.8<br>(16.5) | 24.9<br>(11.3) | 39.9<br>(3.3) | 38.7<br>(3.2) | 43.3<br>(4.0) | 47.2<br>(4.1) | 46.8<br>(3.4) | 44.0<br>(3.8) | 49.1<br>(5.7)  | 50.0<br>(5.4)  | 51.8<br>(7.0) | 55.2 (-58.8, 169.2)                 |                    | 6.8<br>(2.0, 11.8)        | 6.8<br>(2.0, 11.8)            |
| Race/Ethnicity: Black/not Hispanic              | 46.7<br>(1.3)    | 44.8<br>(4.5)  | 42.3<br>(4.4) | 38.1<br>(4.6)  | 48.9<br>(3.4)  | 41.3<br>(4.0) | 44.1<br>(3.8) | 49.7<br>(3.8) | 54.6<br>(4.0) | 52.3<br>(4.1) | 47.2<br>(4.0) | 50.9<br>(4.9)  | 46.1<br>(5.5)  | 49.1<br>(7.5) | 3.1 (-28.7, 34.8)                   |                    | 1.7<br>(0.0, 3.4)         | 1.7<br>(0.0, 3.4)             |
| Race/Ethnicity: Asian/not Hispanic              | 49.3<br>(2.1)    | 50.7<br>(9.3)  | 44.3<br>(8.1) | 54.8<br>(10.1) | 44.9<br>(8.4)  | 43.2<br>(8.4) | 45.1<br>(7.2) | 52.7<br>(7.6) | 39.1<br>(8.1) | 54.5<br>(7.7) | 46.9<br>(9.3) | 47.6<br>(11.9) | 67.5<br>(11.8) | 31.3<br>(9.2) | 33.1 (-33.0, 99.2)                  |                    | 1.2<br>(-1.4, 4.0)        | 1.2<br>(-1.4, 4.0)            |
| Race/Ethnicity: White/not Hispanic              | 57.7<br>(0.9)    | 56.3<br>(2.9)  | 51.9<br>(2.7) | 55.0<br>(2.3)  | 57.9<br>(2.3)  | 59.0<br>(3.5) | 55.1<br>(3.5) | 56.4<br>(3.5) | 57.6<br>(3.5) | 59.0<br>(3.3) | 58.9<br>(3.0) | 59.4<br>(3.2)  | 65.6<br>(3.5)  | 68.0<br>(3.6) | 16.4 (-0.5, 33.4)                   |                    | 1.2<br>(0.5, 1.9)         | 1.2<br>(0.5, 1.9)             |
| Sex: Male                                       | 51.5<br>(0.8)    | 53.0<br>(3.5)  | 50.5<br>(3.2) | 46.9<br>(3.1)  | 53.6<br>(2.9)  | 47.8<br>(3.1) | 50.3<br>(3.1) | 53.3<br>(3.0) | 54.4<br>(3.2) | 52.9<br>(2.9) | 50.5<br>(3.0) | 49.2<br>(3.3)  | 56.1<br>(3.6)  | 49.8<br>(4.0) | 6.0 (-13.1, 25.1)                   |                    | 0.5<br>(-0.5, 1.5)        | 0.5<br>(-0.5, 1.5)            |
| Sex: Female                                     | 54.4<br>(1.2)    | 54.3<br>(3.0)  | 48.0<br>(3.1) | 56.3<br>(2.6)  | 57.1<br>(2.7)  | 52.4<br>(2.9) | 47.3<br>(3.1) | 51.4<br>(3.1) | 52.9<br>(2.9) | 56.3<br>(2.9) | 54.7<br>(2.7) | 61.1<br>(2.8)  | 60.7<br>(3.2)  | 68.0<br>(3.5) | 11.7 (-5.2, 28.6)                   |                    | 1.1<br>(-0.2, 2.5)        | 1.1<br>(-0.2, 2.5)            |
| Insurance coverage: Private only                | 57.6<br>(0.7)    | 58.6<br>(3.3)  | 53.4<br>(3.3) | 54.9<br>(3.5)  | 61.8<br>(3.2)  | 57.6<br>(3.6) | 57.9<br>(3.5) | 56.3<br>(3.7) | 56.4<br>(3.3) | 58.4<br>(3.6) | 55.9<br>(3.3) | 57.8<br>(3.8)  | 62.8<br>(3.8)  | 65.2<br>(4.5) | 7.2 (-10.1, 24.4)                   |                    | 0.4<br>(-0.4, 1.3)        | 0.4<br>(-0.4, 1.3)            |
| Insurance coverage: Medicaid                    | 47.7<br>(1.3)    | 46.1<br>(4.8)  | 45.4<br>(5.0) | 47.0<br>(4.9)  | 52.8<br>(4.7)  | 44.3<br>(4.3) | 36.7<br>(4.1) | 48.8<br>(4.7) | 51.7<br>(4.4) | 44.6<br>(4.8) | 50.2<br>(3.8) | 55.1<br>(5.0)  | 49.5<br>(5.5)  | 49.2<br>(5.8) | 7.4 (-24.7, 39.5)                   |                    | 1.0<br>(-0.9, 3.0)        | 1.0<br>(-0.9, 3.0)            |

|                                   | Average<br>(SE)* | 2008<br>(SE)  | 2009<br>(SE)  | 2010<br>(SE)  | 2011<br>(SE)  | 2012<br>(SE)  | 2013<br>(SE)  | 2014<br>(SE)  | 2015<br>(SE)  | 2016<br>(SE)  | 2017<br>(SE)  | 2018<br>(SE)  | 2019<br>(SE)   | 2020<br>(SE)   | Percent<br>Change<br>(95%<br>CI)*,† | Joinpoint<br>Year‡ | APC<br>(95%<br>CI)*,<br>§ | AA<br>PC<br>(95%<br>CI)*,<br> |
|-----------------------------------|------------------|---------------|---------------|---------------|---------------|---------------|---------------|---------------|---------------|---------------|---------------|---------------|----------------|----------------|-------------------------------------|--------------------|---------------------------|-------------------------------|
| Insurance coverage: Uninsured     | 33.9<br>(1.8)    | 36.6<br>(6.9) | 32.2<br>(5.6) | 42.1<br>(5.1) | 35.9<br>(4.8) | 29.2<br>(3.9) | 26.8<br>(4.7) | 37.8<br>(7.7) | 27.1<br>(7.3) | 45.6<br>(5.0) | 38.3<br>(7.8) | 24.3<br>(7.7) | 30.6<br>(10.2) | 47.6<br>(13.2) | -16.3<br>(-79.1, 46.5)              |                    | -1.3<br>(-4.9, 2.4)       | -1.3<br>(-4.9, 2.4)           |
| Insurance coverage: Medicare only | 57.5<br>(1.4)    | 54.9<br>(2.4) | 52.3<br>(3.0) | 57.8<br>(2.7) | 53.0<br>(2.3) | 52.0<br>(2.6) | 56.1<br>(2.4) | 54.4<br>(2.5) | 62.8<br>(2.7) | 63.2<br>(2.5) | 55.8<br>(2.8) | 59.2<br>(2.8) | 68.2<br>(2.3)  | 62.7<br>(2.8)  | 24.2<br>(10.9, 37.6)                |                    | 1.6<br>(0.4, 2.9)         | 1.6<br>(0.4, 2.9)             |
| Poverty income ratio: > 400%      | 63.4<br>(0.9)    | 62.1<br>(4.1) | 58.4<br>(4.4) | 59.6<br>(4.7) | 64.5<br>(3.6) | 62.1<br>(4.2) | 62.0<br>(3.9) | 61.7<br>(4.4) | 65.3<br>(4.4) | 63.0<br>(4.4) | 63.5<br>(4.4) | 67.1<br>(3.7) | 70.8<br>(4.2)  | 69.4<br>(4.7)  | 14.1<br>(-5.6, 33.7)                |                    | 1.1<br>(0.5, 1.8)         | 1.1<br>(0.5, 1.8)             |
| Poverty income ratio: 200%—399%   | 52.2<br>(1.0)    | 54.4<br>(3.8) | 48.5<br>(4.1) | 48.1<br>(3.8) | 54.7<br>(3.6) | 50.6<br>(4.1) | 49.4<br>(4.1) | 49.8<br>(3.9) | 52.0<br>(4.1) | 51.0<br>(3.9) | 50.8<br>(3.6) | 55.7<br>(5.2) | 61.2<br>(4.1)  | 57.2<br>(5.5)  | 12.6<br>(-8.8, 34.0)                |                    | 0.9<br>(-0.2, 2.1)        | 0.9<br>(-0.2, 2.1)            |
| Poverty income ratio: 100%—199%   | 47.8<br>(1.0)    | 49.9<br>(4.0) | 45.0<br>(4.0) | 51.5<br>(4.1) | 54.6<br>(4.0) | 46.7<br>(4.4) | 49.5<br>(4.2) | 46.3<br>(4.1) | 46.3<br>(3.6) | 50.9<br>(4.4) | 42.8<br>(4.3) | 45.1<br>(4.4) | 44.7<br>(5.5)  | 51.0<br>(6.6)  | -10.3<br>(-36.2, 15.6)              |                    | -1.0<br>(-2.2, 0.2)       | -1.0<br>(-2.2, 0.2)           |
| Poverty income ratio: < 100%      | 43.8<br>(1.8)    | 40.7<br>(4.7) | 40.3<br>(4.8) | 46.3<br>(4.5) | 40.6<br>(4.2) | 36.1<br>(3.7) | 29.3<br>(3.7) | 49.7<br>(5.3) | 44.8<br>(4.7) | 49.5<br>(4.6) | 50.2<br>(4.3) | 50.7<br>(5.4) | 47.5<br>(4.8)  | 51.4<br>(6.4)  | 16.8<br>(-18.5, 52.0)               |                    | 2.3<br>(-0.5, 5.2)        | 2.3<br>(-0.5, 5.2)            |
| Dilated eye exam                  |                  |               |               |               |               |               |               |               |               |               |               |               |                |                |                                     |                    |                           |                               |
| Overall                           | 55.5<br>(0.7)    | 55.5<br>(2.1) | 52.6<br>(2.3) | 56.6<br>(2.1) | 58.8<br>(2.4) | 59.8<br>(2.1) | 57.7<br>(2.2) | 54.8<br>(2.1) | 54.3<br>(2.1) | 55.0<br>(2.2) | 51.7<br>(2.2) | 56.6<br>(2.4) | 52.3<br>(3.0)  | 49.7<br>(2.9)  | -5.7<br>(-18.2, 6.9)                |                    | -0.4<br>(-1.3, 0.4)       | -0.4<br>(-1.3, 0.4)           |
| Age: 18 to 44                     | 47.9<br>(1.2)    | 48.4<br>(3.8) | 44.6<br>(4.2) | 49.4<br>(3.5) | 53.9<br>(4.2) | 54.4<br>(3.5) | 51.9<br>(4.0) | 47.2<br>(3.7) | 44.8<br>(3.8) | 46.8<br>(3.8) | 41.1<br>(4.0) | 49.5<br>(4.4) | 42.3<br>(5.2)  | 41.8<br>(5.2)  | -12.7<br>(-37.7, 12.2)              |                    | -1.1<br>(-2.6, 0.4)       | -1.1<br>(-2.6, 0.4)           |
| Age: 45 to 64                     | 59.7<br>(0.4)    | 58.5<br>(2.1) | 57.7<br>(2.2) | 60.3<br>(1.8) | 60.7<br>(2.0) | 61.3<br>(1.9) | 60.5<br>(2.1) | 58.0<br>(2.2) | 59.6<br>(2.2) | 60.4<br>(2.1) | 58.0<br>(2.1) | 61.8<br>(2.0) | 59.6<br>(2.4)  | 53.0<br>(2.3)  | 1.8<br>(-8.9, 12.6)                 |                    | 0.1<br>(-0.3, 0.6)        | 0.1<br>(-0.3, 0.6)            |
| Age: 65 to 74                     | 71.5<br>(0.6)    | 71.7<br>(2.7) | 70.2<br>(2.4) | 72.1<br>(2.5) | 68.1<br>(2.9) | 72.7<br>(2.4) | 68.7<br>(2.5) | 69.8<br>(2.6) | 74.3<br>(2.2) | 73.7<br>(2.6) | 74.4<br>(2.3) | 70.4<br>(2.3) | 71.5<br>(2.3)  | 67.4<br>(2.5)  | -0.4<br>(-10.1, 9.4)                |                    | 0.2<br>(-0.3, 0.8)        | 0.2<br>(-0.3, 0.8)            |

|                                                    | Average<br>(SE)* | 2008<br>(SE)   | 2009<br>(SE)   | 2010<br>(SE)   | 2011<br>(SE)   | 2012<br>(SE)  | 2013<br>(SE)  | 2014<br>(SE)  | 2015<br>(SE)  | 2016<br>(SE)  | 2017<br>(SE)  | 2018<br>(SE)   | 2019<br>(SE)   | 2020<br>(SE)   | Percent<br>Change<br>(95%<br>CI)*,† | Joinpoint<br>Year‡ | APC<br>(95%<br>CI)*,<br>§ | AAPC<br>(95%<br>CI)*,<br> |
|----------------------------------------------------|------------------|----------------|----------------|----------------|----------------|---------------|---------------|---------------|---------------|---------------|---------------|----------------|----------------|----------------|-------------------------------------|--------------------|---------------------------|---------------------------|
| Age: 75+                                           | 72.0<br>(0.8)    | 72.4<br>(3.2)  | 66.5<br>(3.1)  | 73.8<br>(2.7)  | 73.0<br>(2.9)  | 74.9<br>(3.2) | 72.6<br>(3.1) | 76.4<br>(2.6) | 74.1<br>(2.7) | 68.3<br>(3.1) | 72.5<br>(2.8) | 68.7<br>(2.7)  | 70.4<br>(3.1)  | 69.9<br>(2.6)  | -2.8<br>(-14.7,<br>9.0)             |                    | -0.2<br>(-1.0,<br>0.6)    | -0.2<br>(-1.0,<br>0.6)    |
| Highest degree earned:<br>Less than high school    | 47.7<br>(1.2)    | 48.5<br>(3.9)  | 42.8<br>(3.5)  | 46.2<br>(4.1)  | 56.6<br>(3.6)  | 52.2<br>(4.9) | 49.8<br>(3.3) | 46.1<br>(3.3) | 45.8<br>(6.1) | 45.1<br>(3.6) | 41.4<br>(3.5) | 51.7<br>(5.0)  | 45.5<br>(4.7)  | 36.9<br>(5.8)  | -6.3<br>(-30.5,<br>17.8)            |                    | -0.5<br>(-2.2,<br>1.2)    | -0.5<br>(-2.2,<br>1.2)    |
| Highest degree earned:<br>High school              | 55.0<br>(1.0)    | 54.4<br>(3.2)  | 53.0<br>(3.6)  | 60.3<br>(3.1)  | 56.3<br>(3.3)  | 60.4<br>(4.0) | 57.6<br>(3.9) | 55.7<br>(3.2) | 51.2<br>(4.5) | 55.8<br>(2.9) | 48.7<br>(3.2) | 52.2<br>(3.7)  | 54.7<br>(4.0)  | 51.0<br>(4.5)  | 0.6<br>(-17.9,<br>19.0)             |                    | -0.7<br>(-1.9,<br>0.4)    | -0.7<br>(-1.9,<br>0.4)    |
| Highest degree earned:<br>Greater than high school | 63.1<br>(1.2)    | 63.9<br>(4.2)  | 60.9<br>(4.6)  | 59.1<br>(3.9)  | 65.5<br>(4.2)  | 71.3<br>(5.0) | 64.5<br>(4.2) | 59.7<br>(4.6) | 66.7<br>(4.8) | 61.6<br>(4.7) | 64.2<br>(3.8) | 65.4<br>(4.2)  | 54.8<br>(4.9)  | 53.6<br>(4.9)  | -14.2<br>(-33.0,<br>4.5)            |                    | -0.4<br>(-1.7,<br>0.9)    | -0.4<br>(-1.7,<br>0.9)    |
| Race/Ethnicity:<br>Hispanic                        | 48.5<br>(1.7)    | 51.4<br>(13.8) | 58.9<br>(12.6) | 33.6<br>(14.9) | 54.6<br>(18.6) | 47.4<br>(3.6) | 46.8<br>(3.6) | 51.0<br>(3.5) | 46.1<br>(3.9) | 44.4<br>(3.5) | 46.1<br>(4.6) | 52.6<br>(5.0)  | 49.1<br>(5.5)  | 44.3<br>(6.8)  | -4.4<br>(-58.9,<br>50.1)            |                    | -0.1<br>(-2.8,<br>2.6)    | -0.1<br>(-2.8,<br>2.6)    |
| Race/Ethnicity:<br>Black/not Hispanic              | 53.5<br>(0.8)    | 47.6<br>(4.3)  | 55.6<br>(4.3)  | 57.3<br>(4.2)  | 56.9<br>(4.0)  | 53.5<br>(3.4) | 52.9<br>(3.8) | 57.4<br>(4.6) | 49.9<br>(4.0) | 53.2<br>(4.1) | 53.8<br>(4.9) | 53.1<br>(5.4)  | 50.4<br>(6.3)  | 61.2<br>(7.3)  | 5.9<br>(-26.1,<br>37.9)             |                    | -0.2<br>(-1.3,<br>0.9)    | -0.2<br>(-1.3,<br>0.9)    |
| Race/Ethnicity:<br>Asian/not Hispanic              | 53.4<br>(2.3)    | 66.5<br>(7.5)  | 48.2<br>(7.7)  | 48.7<br>(8.6)  | 50.7<br>(8.6)  | 67.2<br>(7.8) | 62.8<br>(6.6) | 47.0<br>(8.3) | 45.1<br>(9.1) | 48.5<br>(8.7) | 49.4<br>(9.5) | 60.2<br>(11.8) | 46.6<br>(13.7) | 53.8<br>(13.8) | -29.9<br>(-73.2,<br>13.4)           |                    | -1.2<br>(-3.9,<br>1.5)    | -1.2<br>(-3.9,<br>1.5)    |
| Race/Ethnicity:<br>White/not Hispanic              | 58.5<br>(1.1)    | 57.4<br>(2.5)  | 51.5<br>(2.8)  | 58.0<br>(2.3)  | 60.6<br>(2.8)  | 65.8<br>(3.0) | 63.2<br>(3.1) | 57.1<br>(3.3) | 58.4<br>(3.3) | 58.3<br>(3.2) | 53.9<br>(3.3) | 61.9<br>(2.7)  | 55.3<br>(3.8)  | 48.5<br>(3.5)  | -3.6<br>(-19.0,<br>11.7)            |                    | 0.0<br>(-1.3,<br>1.4)     | 0.0<br>(-1.3,<br>1.4)     |

|                                            | Average<br>(SE)* | 2008<br>(SE)  | 2009<br>(SE)  | 2010<br>(SE)  | 2011<br>(SE)  | 2012<br>(SE)  | 2013<br>(SE)  | 2014<br>(SE)  | 2015<br>(SE)  | 2016<br>(SE)  | 2017<br>(SE)  | 2018<br>(SE)   | 2019<br>(SE)   | 2020<br>(SE)   | Percent<br>Change<br>(95%<br>CI)*,† | Joinpoint<br>Year‡ | APC<br>(95%<br>CI)*,<br>§                           | AA<br>PC<br>(95%<br>CI)*,<br> |
|--------------------------------------------|------------------|---------------|---------------|---------------|---------------|---------------|---------------|---------------|---------------|---------------|---------------|----------------|----------------|----------------|-------------------------------------|--------------------|-----------------------------------------------------|-------------------------------|
| Sex: Male                                  | 54.4<br>(0.9)    | 51.3<br>(3.2) | 50.6<br>(3.0) | 55.6<br>(3.0) | 60.2<br>(3.3) | 56.3<br>(3.0) | 58.1<br>(3.2) | 54.9<br>(3.2) | 54.3<br>(2.9) | 54.1<br>(3.1) | 52.1<br>(3.1) | 55.9<br>(3.2)  | 49.7<br>(3.6)  | 54.5<br>(4.7)  | -3.1<br>(-21.4,<br>15.1)            | 2011               | 5.4<br>(-0.8,<br>12.0), -<br>1.6<br>(-2.9,<br>-0.3) | 0.3<br>(-1.3,<br>1.9)         |
| Sex:<br>Female                             | 56.5<br>(0.8)    | 59.3<br>(2.9) | 54.2<br>(3.2) | 57.6<br>(2.7) | 57.3<br>(2.8) | 63.3<br>(2.6) | 57.3<br>(3.1) | 54.7<br>(2.9) | 54.2<br>(2.8) | 55.8<br>(3.0) | 51.3<br>(2.8) | 57.3<br>(3.1)  | 55.1<br>(3.6)  | 45.3<br>(3.6)  | -6.9<br>(-21.8,<br>7.9)             |                    | -0.6<br>(-1.5,<br>0.3)                              | -0.6<br>(-1.5,<br>0.3)        |
| Insurance<br>coverage:<br>Private<br>only  | 57.4<br>(1.3)    | 57.0<br>(3.1) | 57.1<br>(3.5) | 61.3<br>(3.3) | 61.5<br>(3.8) | 61.9<br>(3.7) | 65.1<br>(3.6) | 56.4<br>(3.5) | 51.6<br>(3.6) | 59.3<br>(3.2) | 52.0<br>(3.5) | 57.1<br>(3.5)  | 48.7<br>(4.4)  | 48.1<br>(4.5)  | -14.5<br>(-32.1,<br>3.1)            |                    | -1.3<br>(-2.7,<br>0.1)                              | -1.3<br>(-2.7,<br>0.1)        |
| Insurance<br>coverage:<br>Medicaid         | 51.0<br>(1.3)    | 57.1<br>(4.8) | 50.1<br>(4.7) | 52.6<br>(4.9) | 56.6<br>(4.6) | 56.5<br>(4.8) | 50.9<br>(4.3) | 46.3<br>(4.4) | 52.0<br>(4.2) | 41.3<br>(4.4) | 46.2<br>(4.3) | 52.5<br>(5.0)  | 50.3<br>(5.4)  | 45.3<br>(5.6)  | -11.8<br>(-35.4,<br>11.8)           |                    | -1.3<br>(-2.9,<br>0.3)                              | -1.3<br>(-2.9,<br>0.3)        |
| Insurance<br>coverage:<br>Uninsured        | 33.8<br>(1.8)    | 26.9<br>(5.5) | 27.4<br>(4.8) | 27.4<br>(4.1) | 35.8<br>(4.8) | 36.3<br>(4.8) | 23.4<br>(4.5) | 43.6<br>(6.8) | 40.3<br>(9.9) | 34.8<br>(6.0) | 32.2<br>(8.3) | 36.2<br>(11.2) | 41.6<br>(13.2) | 30.0<br>(10.5) | 54.9<br>(-59.9,<br>169.7)           |                    | 3.3<br>(0.1,<br>6.6)                                | 3.3<br>(0.1,<br>6.6)          |
| Insurance<br>coverage:<br>Medicare<br>only | 69.7<br>(0.8)    | 67.9<br>(2.9) | 64.9<br>(2.7) | 72.0<br>(2.3) | 67.4<br>(2.6) | 74.2<br>(2.2) | 71.7<br>(2.2) | 68.5<br>(3.0) | 71.7<br>(2.2) | 71.6<br>(2.4) | 68.9<br>(2.3) | 66.6<br>(2.6)  | 71.3<br>(2.1)  | 69.9<br>(2.3)  | 5.0 (-5.5,<br>15.5)                 |                    | 0.2<br>(-0.5,<br>1.0)                               | 0.2<br>(-0.5,<br>1.0)         |
| Poverty<br>income<br>ratio: ><br>400%      | 65.0<br>(1.5)    | 64.5<br>(4.3) | 58.5<br>(4.4) | 66.7<br>(4.0) | 67.3<br>(3.9) | 69.6<br>(3.8) | 73.7<br>(3.7) | 72.2<br>(4.0) | 62.1<br>(4.6) | 65.3<br>(3.9) | 60.6<br>(4.5) | 63.6<br>(3.7)  | 55.4<br>(4.9)  | 56.4<br>(5.2)  | -14.1<br>(-32.8,<br>4.6)            | 2013               | 3.4<br>(-0.9,<br>7.8), -3.8<br>(-6.8,<br>-0.7)      | -0.6<br>(-2.7,<br>1.5)        |



|                                              | Average<br>(SE)* | 2008<br>(SE)  | 2009<br>(SE)  | 2010<br>(SE)  | 2011<br>(SE)  | 2012<br>(SE)  | 2013<br>(SE)  | 2014<br>(SE)  | 2015<br>(SE)  | 2016<br>(SE)  | 2017<br>(SE)  | 2018<br>(SE)  | 2019<br>(SE)  | 2020<br>(SE)  | Percent<br>Change<br>(95%<br>CI)*,† | Joinpoint<br>Year‡ | APC<br>(95%<br>CI)*,<br>§              | AA<br>PC<br>(95%<br>CI)*,<br> |
|----------------------------------------------|------------------|---------------|---------------|---------------|---------------|---------------|---------------|---------------|---------------|---------------|---------------|---------------|---------------|---------------|-------------------------------------|--------------------|----------------------------------------|-------------------------------|
| Poverty<br>income<br>ratio:<br>200%—<br>399% | 53.6<br>(1.3)    | 56.6<br>(3.7) | 51.4<br>(4.0) | 50.9<br>(3.7) | 59.6<br>(4.2) | 56.4<br>(4.2) | 52.1<br>(4.1) | 48.6<br>(3.5) | 51.3<br>(4.5) | 44.1<br>(3.7) | 55.1<br>(4.2) | 61.5<br>(4.4) | 55.3<br>(5.4) | 41.3<br>(5.0) | -2.3<br>(-24.7,<br>20.0)            |                    | 0.0<br>(-1.8,<br>1.8)                  | 0.0<br>(-1.8,<br>1.8)         |
| Poverty<br>income<br>ratio:<br>100%—<br>199% | 51.6<br>(1.7)    | 50.1<br>(4.0) | 50.2<br>(5.3) | 60.0<br>(4.0) | 56.0<br>(3.6) | 59.0<br>(3.9) | 58.2<br>(4.3) | 44.9<br>(4.2) | 47.1<br>(3.5) | 55.9<br>(4.2) | 44.8<br>(4.3) | 51.1<br>(4.8) | 42.4<br>(4.8) | 50.0<br>(7.0) | -15.4<br>(-38.6,<br>7.9)            |                    | -1.6<br>(-3.6,<br>0.4)                 | -1.6<br>(-3.6,<br>0.4)        |
| Poverty<br>income<br>ratio: <<br>100%        | 47.8<br>(1.3)    | 42.8<br>(4.7) | 47.8<br>(4.0) | 47.2<br>(4.9) | 45.0<br>(4.6) | 52.0<br>(4.0) | 44.5<br>(4.8) | 50.9<br>(5.0) | 55.2<br>(4.9) | 51.1<br>(4.9) | 40.6<br>(4.6) | 42.5<br>(4.7) | 54.2<br>(4.5) | 50.4<br>(6.3) | 26.6<br>(-7.5,<br>60.8)             |                    | 0.5<br>(-1.5,<br>2.5)                  | 0.5<br>(-1.5,<br>2.5)         |
| Foot examination                             |                  |               |               |               |               |               |               |               |               |               |               |               |               |               |                                     |                    |                                        |                               |
| Overall                                      | 61.4<br>(0.7)    | 57.9<br>(2.4) | 61.3<br>(2.2) | 60.8<br>(2.0) | 64.3<br>(1.8) | 66.2<br>(2.0) | 61.7<br>(2.4) | 64.0<br>(2.2) | 60.3<br>(2.1) | 59.5<br>(2.2) | 62.0<br>(1.9) | 59.4<br>(2.5) | 59.7<br>(2.5) | 54.4<br>(2.9) | 3.2 (-8.5,<br>14.9)                 | 2011               | 3.5<br>(-1.1,<br>-2.1,<br>-0.1)        | 0.2<br>(-1.0,<br>1.4)         |
| Age: 18 to<br>44                             | 55.7<br>(1.1)    | 50.6<br>(3.9) | 56.9<br>(4.0) | 53.4<br>(3.6) | 60.5<br>(3.4) | 64.1<br>(3.5) | 56.4<br>(4.3) | 57.9<br>(4.0) | 52.0<br>(3.9) | 51.8<br>(3.9) | 56.6<br>(3.4) | 54.4<br>(4.4) | 53.7<br>(4.5) | 49.2<br>(5.5) | 6.1 (-17.7,<br>30.0)                |                    | -0.3<br>(-1.6,<br>1.1)                 | -0.3<br>(-1.6,<br>1.1)        |
| Age: 45 to<br>64                             | 65.2<br>(0.5)    | 65.0<br>(2.0) | 63.7<br>(1.9) | 66.9<br>(1.7) | 65.4<br>(2.0) | 66.1<br>(2.0) | 64.6<br>(1.8) | 67.8<br>(1.8) | 67.4<br>(2.0) | 65.4<br>(2.0) | 65.5<br>(1.9) | 61.3<br>(2.0) | 63.2<br>(2.3) | 56.8<br>(2.5) | -2.8<br>(-11.8,<br>6.2)             |                    | -0.2<br>(-0.8,<br>0.3)                 | -0.2<br>(-0.8,<br>0.3)        |
| Age: 65 to<br>74                             | 72.3<br>(0.8)    | 66.7<br>(3.3) | 70.1<br>(2.8) | 71.6<br>(2.8) | 71.9<br>(2.6) | 71.0<br>(2.1) | 75.3<br>(2.2) | 75.6<br>(2.4) | 76.3<br>(2.4) | 75.5<br>(2.3) | 69.7<br>(2.3) | 72.6<br>(1.9) | 71.6<br>(2.2) | 66.8<br>(2.4) | 7.4 (-4.9,<br>19.7)                 | 2014               | 1.9<br>(0.5,<br>-1.4,<br>-3.3,<br>0.6) | 0.4<br>(-0.6,<br>1.4)         |
| Age: 75+                                     | 73.0<br>(0.8)    | 69.6<br>(3.2) | 72.3<br>(2.8) | 74.1<br>(2.9) | 76.8<br>(2.7) | 75.3<br>(3.2) | 70.3<br>(3.0) | 77.1<br>(2.4) | 70.8<br>(3.2) | 70.6<br>(3.1) | 75.7<br>(2.5) | 70.4<br>(3.0) | 73.3<br>(2.8) | 65.7<br>(3.4) | 5.3 (-7.0,<br>17.6)                 |                    | 0.0<br>(-0.7,<br>0.7)                  | 0.0<br>(-0.7,<br>0.7)         |

|                                                 | Average<br>(SE)* | 2008<br>(SE)   | 2009<br>(SE)   | 2010<br>(SE)   | 2011<br>(SE)   | 2012<br>(SE)  | 2013<br>(SE)  | 2014<br>(SE)  | 2015<br>(SE)  | 2016<br>(SE)  | 2017<br>(SE)  | 2018<br>(SE)  | 2019<br>(SE)   | 2020<br>(SE)   | Percent<br>Change<br>(95%<br>CI)*,† | Joinpoint<br>Year‡ | APC<br>(95%<br>CI)*,<br>§                | AA<br>PC<br>(95%<br>CI)*,<br> |
|-------------------------------------------------|------------------|----------------|----------------|----------------|----------------|---------------|---------------|---------------|---------------|---------------|---------------|---------------|----------------|----------------|-------------------------------------|--------------------|------------------------------------------|-------------------------------|
| Highest degree earned: Less than high school    | 56.9<br>(1.5)    | 51.4<br>(4.0)  | 56.5<br>(3.4)  | 55.6<br>(3.2)  | 67.7<br>(2.9)  | 65.5<br>(5.3) | 56.2<br>(3.0) | 57.8<br>(3.6) | 51.3<br>(6.0) | 58.5<br>(3.4) | 57.3<br>(4.1) | 50.7<br>(4.8) | 54.6<br>(5.3)  | 45.1<br>(5.9)  | 6.1 (-19.5, 31.7)                   |                    | -0.5<br>(-2.2, 1.2)                      | -0.5<br>(-2.2, 1.2)           |
| Highest degree earned: High school              | 62.4<br>(1.1)    | 56.0<br>(3.1)  | 62.4<br>(3.5)  | 61.1<br>(2.8)  | 62.8<br>(3.1)  | 70.5<br>(3.5) | 65.2<br>(3.8) | 67.1<br>(3.5) | 56.8<br>(4.3) | 59.2<br>(3.3) | 62.1<br>(3.2) | 62.8<br>(3.8) | 63.2<br>(3.8)  | 56.2<br>(4.1)  | 13.0 (-5.2, 31.2)                   |                    | 0.2<br>(-1.0, 1.5)                       | 0.2<br>(-1.0, 1.5)            |
| Highest degree earned: Greater than high school | 63.9<br>(1.1)    | 67.6<br>(4.1)  | 63.8<br>(4.5)  | 64.3<br>(4.0)  | 63.9<br>(3.7)  | 73.9<br>(5.9) | 61.3<br>(4.4) | 64.0<br>(4.4) | 61.6<br>(6.8) | 60.9<br>(4.9) | 65.2<br>(3.9) | 60.8<br>(3.6) | 59.5<br>(4.5)  | 55.9<br>(5.1)  | -11.9 (-28.7, 4.9)                  |                    | -0.9<br>(-1.8, 0.1)                      | -0.9<br>(-1.8, 0.1)           |
| Race/Ethnicity: Hispanic                        | 53.0<br>(2.8)    | 41.3<br>(13.3) | 33.1<br>(11.0) | 60.8<br>(16.0) | 73.9<br>(12.3) | 58.3<br>(3.6) | 50.6<br>(3.5) | 55.2<br>(4.0) | 58.9<br>(3.7) | 47.6<br>(3.8) | 49.8<br>(4.2) | 53.3<br>(5.6) | 53.4<br>(5.7)  | 48.3<br>(6.8)  | 29.3 (-56.5, 115.1)                 |                    | 1.3<br>(-2.5, 5.3)                       | 1.3<br>(-2.5, 5.3)            |
| Race/Ethnicity: Black/not Hispanic              | 61.7<br>(1.2)    | 53.5<br>(4.3)  | 62.2<br>(4.3)  | 59.9<br>(4.5)  | 66.7<br>(3.2)  | 69.9<br>(3.5) | 59.7<br>(3.5) | 65.7<br>(4.1) | 60.8<br>(5.9) | 58.2<br>(4.7) | 62.7<br>(4.4) | 57.9<br>(4.7) | 63.2<br>(5.6)  | 61.0<br>(7.0)  | 18.1 (-9.6, 45.9)                   |                    | 0.2<br>(-1.2, 1.6)                       | 0.2<br>(-1.2, 1.6)            |
| Race/Ethnicity: Asian/not Hispanic              | 58.2<br>(2.1)    | 59.2<br>(8.4)  | 49.9<br>(7.3)  | 65.9<br>(9.6)  | 61.7<br>(8.6)  | 66.8<br>(7.4) | 68.1<br>(5.7) | 59.8<br>(8.2) | 58.6<br>(9.4) | 55.2<br>(8.1) | 61.2<br>(9.0) | 47.2<br>(9.6) | 44.2<br>(13.8) | 45.0<br>(14.3) | -25.3 (-75.4, 24.8)                 |                    | -1.8<br>(-4.1, 0.5)                      | -1.8<br>(-4.1, 0.5)           |
| Race/Ethnicity: White/not Hispanic              | 64.1<br>(0.8)    | 59.5<br>(2.9)  | 62.2<br>(2.7)  | 60.9<br>(2.4)  | 64.1<br>(2.4)  | 68.9<br>(2.9) | 66.6<br>(3.8) | 67.1<br>(3.2) | 61.0<br>(3.5) | 65.0<br>(3.2) | 65.2<br>(3.0) | 64.0<br>(3.0) | 64.2<br>(3.0)  | 56.2<br>(4.0)  | 7.9 (-6.2, 22.1)                    |                    | 0.5<br>(-0.3, 1.2)                       | 0.5<br>(-0.3, 1.2)            |
| Sex: Male                                       | 62.8<br>(1.0)    | 57.7<br>(3.3)  | 62.0<br>(3.1)  | 62.0<br>(3.1)  | 66.9<br>(2.9)  | 66.5<br>(3.0) | 62.5<br>(3.1) | 65.0<br>(3.2) | 67.5<br>(2.6) | 61.7<br>(3.1) | 64.9<br>(2.8) | 59.5<br>(3.2) | 57.2<br>(3.5)  | 56.6<br>(4.2)  | -0.9 (-17.1, 15.4)                  | 2011               | 5.1<br>(-1.9, 12.6), -1.4<br>(-2.9, 0.0) | 0.3<br>(-1.5, 2.1)            |

|                                              | Average<br>(SE)* | 2008<br>(SE)       | 2009<br>(SE)       | 2010<br>(SE)       | 2011<br>(SE)       | 2012<br>(SE)       | 2013<br>(SE)       | 2014<br>(SE)       | 2015<br>(SE)       | 2016<br>(SE)       | 2017<br>(SE)       | 2018<br>(SE)       | 2019<br>(SE)        | 2020<br>(SE)        | Percent<br>Change<br>(95%<br>CI)*,† | Joinpoint<br>Year‡ | APC<br>(95%<br>CI)*,<br>§  | AA<br>PC<br>(95%<br>CI)*,<br> |
|----------------------------------------------|------------------|--------------------|--------------------|--------------------|--------------------|--------------------|--------------------|--------------------|--------------------|--------------------|--------------------|--------------------|---------------------|---------------------|-------------------------------------|--------------------|----------------------------|-------------------------------|
| Sex:<br>Female                               | 60.2<br>(0.8)    | 58.1<br>(2.9)<br>) | 60.8<br>(3.1)<br>) | 59.6<br>(2.9)<br>) | 61.8<br>(2.6)<br>) | 66.0<br>(2.8)<br>) | 60.9<br>(3.3)<br>) | 63.1<br>(2.8)<br>) | 54.1<br>(3.0)<br>) | 57.5<br>(2.8)<br>) | 59.2<br>(2.7)<br>) | 59.2<br>(3.3)<br>) | 62.4<br>(3.2)<br>)  | 52.4<br>(4.0)<br>)  | 7.5 (-<br>7.7,<br>22.7)             |                    | -0.1<br>(-<br>1.1,<br>0.8) | -0.1<br>(-<br>1.1,<br>0.8)    |
| Insurance<br>coverage:<br>Private<br>only    | 62.8<br>(0.9)    | 61.4<br>(3.4)<br>) | 65.0<br>(3.2)<br>) | 61.9<br>(3.2)<br>) | 63.9<br>(2.9)<br>) | 67.9<br>(3.3)<br>) | 64.5<br>(3.5)<br>) | 63.2<br>(3.5)<br>) | 57.3<br>(3.8)<br>) | 59.7<br>(3.2)<br>) | 68.3<br>(2.9)<br>) | 58.6<br>(4.0)<br>) | 61.4<br>(3.4)<br>)  | 53.3<br>(4.8)<br>)  | 0.0 (-<br>15.4,<br>15.4)            |                    | -0.4<br>(-<br>1.4,<br>0.6) | -0.4<br>(-<br>1.4,<br>0.6)    |
| Insurance<br>coverage:<br>Medicaid           | 59.3<br>(1.8)    | 51.8<br>(4.5)<br>) | 61.3<br>(3.8)<br>) | 60.6<br>(4.9)<br>) | 68.9<br>(4.2)<br>) | 68.8<br>(4.3)<br>) | 60.0<br>(4.8)<br>) | 57.6<br>(4.3)<br>) | 66.3<br>(3.8)<br>) | 51.3<br>(4.4)<br>) | 56.1<br>(4.1)<br>) | 60.0<br>(4.1)<br>) | 48.9<br>(5.0)<br>)  | 54.5<br>(5.2)<br>)  | -5.5<br>(-<br>30.4,<br>19.3)        |                    | -1.0<br>(-<br>3.1,<br>1.0) | -1.0<br>(-<br>3.1,<br>1.0)    |
| Insurance<br>coverage:<br>Uninsured          | 43.3<br>(2.3)    | 40.2<br>(6.9)<br>) | 37.8<br>(6.0)<br>) | 45.2<br>(4.9)<br>) | 46.1<br>(5.3)<br>) | 46.4<br>(5.5)<br>) | 38.0<br>(6.6)<br>) | 60.1<br>(6.6)<br>) | 37.8<br>(6.7)<br>) | 49.8<br>(7.4)<br>) | 31.1<br>(6.6)<br>) | 35.0<br>(9.9)<br>) | 51.7<br>(12.9)<br>) | 31.3<br>(11.0)<br>) | 28.7<br>(-<br>47.8,<br>105.2)       |                    | -0.1<br>(-<br>3.7,<br>3.6) | -0.1<br>(-<br>3.7,<br>3.6)    |
| Insurance<br>coverage:<br>Medicare<br>only   | 72.0<br>(0.6)    | 68.7<br>(2.5)<br>) | 71.3<br>(2.5)<br>) | 72.4<br>(2.5)<br>) | 70.6<br>(2.8)<br>) | 72.5<br>(2.2)<br>) | 73.1<br>(2.1)<br>) | 76.0<br>(2.3)<br>) | 72.3<br>(2.3)<br>) | 74.8<br>(2.4)<br>) | 69.2<br>(2.5)<br>) | 69.0<br>(2.1)<br>) | 74.0<br>(1.8)<br>)  | 67.0<br>(2.3)<br>)  | 7.7 (-<br>1.6,<br>17.1)             |                    | 0.2<br>(-<br>0.4,<br>0.8)  | 0.2<br>(-<br>0.4,<br>0.8)     |
| Poverty<br>income<br>ratio: ><br>400%        | 66.7<br>(1.2)    | 62.9<br>(4.2)<br>) | 61.5<br>(4.6)<br>) | 72.5<br>(2.7)<br>) | 64.4<br>(3.7)<br>) | 63.7<br>(4.1)<br>) | 73.0<br>(3.8)<br>) | 72.8<br>(4.0)<br>) | 65.3<br>(4.1)<br>) | 65.2<br>(4.4)<br>) | 71.2<br>(3.7)<br>) | 62.8<br>(4.1)<br>) | 65.0<br>(4.4)<br>)  | 58.8<br>(5.0)<br>)  | 3.3 (-<br>16.1,<br>22.6)            |                    | 0.2<br>(-<br>1.1,<br>1.4)  | 0.2<br>(-<br>1.1,<br>1.4)     |
| Poverty<br>income<br>ratio:<br>200%—<br>399% | 61.2<br>(1.4)    | 59.0<br>(4.2)<br>) | 66.1<br>(3.7)<br>) | 56.4<br>(3.7)<br>) | 67.1<br>(3.6)<br>) | 70.9<br>(4.2)<br>) | 56.4<br>(4.2)<br>) | 61.8<br>(4.0)<br>) | 59.8<br>(4.5)<br>) | 53.7<br>(4.0)<br>) | 63.1<br>(3.6)<br>) | 62.8<br>(4.3)<br>) | 57.2<br>(5.1)<br>)  | 56.2<br>(5.2)<br>)  | -3.0<br>(-<br>24.7,<br>18.8)        |                    | -0.5<br>(-<br>2.1,<br>1.0) | -0.5<br>(-<br>2.1,<br>1.0)    |
| Poverty<br>income<br>ratio:<br>100%—<br>199% | 60.5<br>(1.2)    | 56.1<br>(4.0)<br>) | 63.3<br>(4.7)<br>) | 60.8<br>(4.2)<br>) | 64.7<br>(3.6)<br>) | 66.8<br>(4.0)<br>) | 63.5<br>(4.1)<br>) | 59.5<br>(4.9)<br>) | 60.6<br>(3.7)<br>) | 61.2<br>(4.0)<br>) | 59.0<br>(4.3)<br>) | 50.4<br>(4.3)<br>) | 59.7<br>(5.9)<br>)  | 44.5<br>(6.1)<br>)  | 6.4 (-<br>18.9,<br>31.7)            |                    | -0.8<br>(-<br>2.1,<br>0.5) | -0.8<br>(-<br>2.1,<br>0.5)    |
| Poverty<br>income<br>ratio: <<br>100%        | 54.4<br>(1.4)    | 48.3<br>(5.0)<br>) | 49.4<br>(3.8)<br>) | 50.2<br>(4.4)<br>) | 59.2<br>(4.3)<br>) | 61.5<br>(4.0)<br>) | 53.2<br>(5.6)<br>) | 60.0<br>(4.7)<br>) | 51.2<br>(4.8)<br>) | 55.3<br>(4.4)<br>) | 48.2<br>(4.4)<br>) | 60.5<br>(4.9)<br>) | 55.3<br>(4.6)<br>)  | 52.6<br>(5.5)<br>)  | 14.5<br>(-<br>15.3,<br>44.3)        |                    | 0.8<br>(-<br>0.9,<br>2.5)  | 0.8<br>(-<br>0.9,<br>2.5)     |

\*Values in these columns were estimated excluding data from 2020.

†Percent change: the percent change in the proportion from 2008 to 2019.

‡Years identified as Joinpoint years.

|                  |              |              |              |              |              |              |              |              |              |              |              |              |              |                                     |                    |                           |                               |
|------------------|--------------|--------------|--------------|--------------|--------------|--------------|--------------|--------------|--------------|--------------|--------------|--------------|--------------|-------------------------------------|--------------------|---------------------------|-------------------------------|
| Average<br>(SE)* | 2008<br>(SE) | 2009<br>(SE) | 2010<br>(SE) | 2011<br>(SE) | 2012<br>(SE) | 2013<br>(SE) | 2014<br>(SE) | 2015<br>(SE) | 2016<br>(SE) | 2017<br>(SE) | 2018<br>(SE) | 2019<br>(SE) | 2020<br>(SE) | Percent<br>Change<br>(95%<br>CI)*,† | Joinpoint<br>Year‡ | APC<br>(95%<br>CI)*,<br>§ | AA<br>PC<br>(95%<br>CI)*,<br> |
|------------------|--------------|--------------|--------------|--------------|--------------|--------------|--------------|--------------|--------------|--------------|--------------|--------------|--------------|-------------------------------------|--------------------|---------------------------|-------------------------------|

§Annual percent change: the slope of the line in each period demarcated by a Joinpoint year. If two Joinpoint years are identified, there will be three different annual percent changes. Joinpoint years are identified by permutation test, whereas the test of significance for APC is an asymptotic t-test. Due to the omnibus nature of the permutation test and the use of all the data in identifying the Joinpoints, the permutation tests are more powerful. In some cases, Joinpoint years are identified but the corresponding intervals for the APC will overlap zero due to this power difference.

||Average annual percent change: the slope of the line over the entire study period.
