# Supplementary material
Source: publisher figshare collection journal article supplement (https://diabetesjournals.figshare.com/articles/dataset/_/24194397)
Supplement: Supplementary file 2 [file 1]

Supplemental Table 2: Age-adjusted trends in proportions of U.S. adults with diagnosed diabetes, overall and by subgroup, who report receiving either none of six recommended care services or all six recommended care services—at least one dental visit, one dilated eye exam, one foot exam, two or more A1C tests, cholesterol level tested, and an influenza vaccine.

|          | Number of services | 2008 (SE) | 2009 (SE) | 2010 (SE) | 2011 (SE) | 2012 (SE) | 2013 (SE) | 2014 (SE) | 2015 (SE) | 2016 (SE) | 2017 (SE)  | 2018 (SE)  | 2019 (SE)  | 2020 (SE) | Percent Change (95% CI) <sup>*,†</sup> | Joinpoint Year <sup>‡</sup> | APC Period 1 (95% CI) <sup>*,§</sup> | APC Period 2 (95% CI) <sup>*,§</sup> | AA PC (95% CI) <sup>*,  </sup> |
|----------|--------------------|-----------|-----------|-----------|-----------|-----------|-----------|-----------|-----------|-----------|------------|------------|------------|-----------|----------------------------------------|-----------------------------|--------------------------------------|--------------------------------------|--------------------------------|
| Overall  |                    |           |           |           |           |           |           |           |           |           |            |            |            |           |                                        |                             |                                      |                                      |                                |
| -        | Zero services      | 5.1 (1.2) | 5.4 (1.3) | 3.0 (0.6) | 3.1 (0.8) | 4.3 (0.8) | 2.9 (0.6) | 3.5 (0.9) | 2.8 (0.8) | 2.3 (0.5) | 7.3 (1.2)  | 7.7 (1.3)  | 6.1 (1.2)  | 8.2 (1.9) | 18.5 (-51.5, 88.4)                     |                             | 3.1 (-4.5, 11.3)                     |                                      | 3.1 (-4.5, 11.3)               |
| -        | All services       | 7.1 (1.3) | 7.2 (1.1) | 7.6 (1.0) | 8.7 (1.3) | 7.8 (1.0) | 8.1 (0.9) | 7.5 (1.0) | 6.5 (0.6) | 7.9 (1.6) | 8.0 (1.3)  | 7.3 (0.8)  | 10.8 (1.7) | 7.9 (1.3) | 51.6 (-19.9, 123.1)                    |                             | 1.4 (-0.9, 3.7)                      |                                      | 1.4 (-0.9, 3.7)                |
| Age      |                    |           |           |           |           |           |           |           |           |           |            |            |            |           |                                        |                             |                                      |                                      |                                |
| 18 to 44 | Zero services      | 7.9 (2.2) | 8.0 (2.3) | 4.0 (1.2) | 4.8 (1.5) | 6.2 (1.5) | 3.4 (1.1) | 4.7 (1.7) | 4.3 (1.5) | 3.4 (1.0) | 10.5 (2.2) | 11.2 (2.4) | 8.5 (2.2)  | 9.5 (3.3) | 6.7 (-72.1, 85.5)                      |                             | 2.8 (-5.2, 11.6)                     |                                      | 2.8 (-5.2, 11.6)               |
| 45 to 64 | Zero services      | 2.8 (0.6) | 3.3 (0.7) | 2.3 (0.5) | 1.7 (0.4) | 3.1 (0.6) | 3.0 (0.6) | 3.1 (0.7) | 1.6 (0.4) | 1.4 (0.3) | 4.2 (0.7)  | 4.4 (0.8)  | 4.3 (1.0)  | 8.0 (1.5) | 57.0 (-38.8, 152.7)                    |                             | 3.1 (-4.4, 11.1)                     |                                      | 3.1 (-4.4, 11.1)               |
| 65 to 74 | Zero services      | 0.2 (0.2) | 0.8 (0.5) | 0.5 (0.4) | 0.6 (0.3) | 0.6 (0.3) | 1.0 (0.5) | 0.9 (0.5) | 0.5 (0.3) | 0.4 (0.2) | 3.7 (1.0)  | 2.3 (0.6)  | 1.2 (0.5)  | 1.8 (0.7) | 451.4 (-712.6, 1615.3)                 |                             | 14.4 (1.8, 28.6)                     |                                      | 14.4 (1.8, 28.6)               |
| 75+      | Zero services      | 0.8 (0.4) | 1.0 (0.7) | 1.5 (1.0) | 0.6 (0.6) | 0.3 (0.2) | 0.8 (0.5) | 0.3 (0.2) | 0.1 (0.1) | 0.7 (0.4) | 2.3 (0.8)  | 3.1 (1.5)  | 2.1 (0.8)  | 6.7 (1.7) | 168.2 (-194.9, 531.4)                  |                             | 7.6 (-10.3, 29.0)                    |                                      | 7.6 (-10.3, 29.0)              |

|                          | Number of services | 2008 (SE)  | 2009 (SE)  | 2010 (SE)  | 2011 (SE)  | 2012 (SE)  | 2013 (SE)  | 2014 (SE)  | 2015 (SE)  | 2016 (SE)  | 2017 (SE)  | 2018 (SE)  | 2019 (SE)  | 2020 (SE)  | Percent Change (95% CI) <sup>*,†</sup> | Joinpoint Year <sup>‡</sup> | APC Period 1 (95% CI) <sup>*,§</sup> | APC Period 2 (95% CI) <sup>*,§</sup> | AA PC (95% CI) <sup>*,  </sup> |
|--------------------------|--------------------|------------|------------|------------|------------|------------|------------|------------|------------|------------|------------|------------|------------|------------|----------------------------------------|-----------------------------|--------------------------------------|--------------------------------------|--------------------------------|
| 18 to 44                 | All services       | 5.2 (2.1)  | 3.8 (1.8)  | 5.5 (1.7)  | 7.8 (2.4)  | 6.0 (1.6)  | 6.7 (1.3)  | 4.7 (1.8)  | 1.7 (0.8)  | 5.9 (2.8)  | 4.6 (2.2)  | 3.2 (1.4)  | 7.7 (3.0)  | 3.7 (2.2)  | 46.7 (-115.1, 208.4)                   |                             | -1.5 (-9.3, 7.0)                     |                                      | -1.5 (-9.3, 7.0)               |
| 45 to 64                 | All services       | 9.1 (1.2)  | 11.1 (1.4) | 9.4 (1.4)  | 9.1 (1.3)  | 8.7 (1.4)  | 8.8 (1.4)  | 8.9 (1.3)  | 10.5 (1.4) | 8.5 (1.3)  | 9.9 (1.3)  | 10.4 (1.2) | 11.5 (1.5) | 10.8 (1.7) | 26.7 (-20.3, 73.8)                     |                             | 1.0 (-0.9, 2.9)                      |                                      | 1.0 (-0.9, 2.9)                |
| 65 to 74                 | All services       | 8.1 (1.9)  | 11.9 (1.9) | 12.7 (2.3) | 12.9 (1.9) | 11.4 (1.7) | 12.0 (1.9) | 15.5 (2.2) | 15.3 (2.3) | 17.2 (2.1) | 16.1 (2.0) | 14.4 (1.7) | 20.4 (2.2) | 15.8 (2.0) | 151.7 (26.7, 276.8)                    |                             | 5.8 (3.3, 8.4)                       |                                      | 5.8 (3.3, 8.4)                 |
| 75+                      | All services       | 11.0 (2.2) | 9.8 (2.1)  | 9.0 (1.9)  | 8.5 (2.0)  | 12.0 (2.4) | 10.8 (2.0) | 11.7 (2.3) | 13.4 (2.1) | 9.2 (2.0)  | 13.6 (2.2) | 14.4 (2.1) | 17.8 (2.2) | 16.3 (2.6) | 62.0 (-12.3, 136.3)                    |                             | 4.5 (1.4, 7.7)                       |                                      | 4.5 (1.4, 7.7)                 |
| Highest degree earned    |                    |            |            |            |            |            |            |            |            |            |            |            |            |            |                                        |                             |                                      |                                      |                                |
| Less than high school    | Zero services      | 10.8 (4.1) | 12.1 (3.8) | 5.7 (1.7)  | 4.1 (1.0)  | 9.8 (3.9)  | 3.5 (1.0)  | 4.2 (1.3)  | 3.5 (1.9)  | 5.5 (2.1)  | 8.3 (1.8)  | 14.9 (3.8) | 13.4 (3.6) | 21.4 (6.6) | 23.4 (-88.9, 135.6)                    | 2015                        | -14.2 (-26.9, 0.7)                   | 48.2 (1.3, 116.7)                    | 4.7 (-9.2, 20.7)               |
| High school              | Zero services      | 4.0 (1.1)  | 4.5 (1.6)  | 1.6 (0.6)  | 2.6 (0.9)  | 3.7 (1.5)  | 2.5 (0.8)  | 2.8 (1.0)  | 5.3 (3.0)  | 1.5 (0.6)  | 9.6 (2.2)  | 7.6 (2.2)  | 3.4 (1.2)  | 7.4 (2.6)  | -14.3 (-88.8, 60.2)                    |                             | 5.1 (-5.3, 16.7)                     |                                      | 5.1 (-5.3, 16.7)               |
| Greater than high school | Zero services      | 2.3 (1.0)  | 0.8 (0.4)  | 3.1 (1.5)  | 3.3 (2.1)  | 4.3 (2.6)  | 2.8 (1.3)  | 4.0 (2.4)  | 0.6 (0.4)  | 1.1 (0.8)  | 3.2 (1.3)  | 3.2 (1.4)  | 3.7 (1.7)  | 2.3 (0.7)  | 57.9 (-136.9, 252.7)                   |                             | 2.3 (-10.4, 16.7)                    |                                      | 2.3 (-10.4, 16.7)              |

|                          | Number of services | 2008 (SE)  | 2009 (SE)   | 2010 (SE)  | 2011 (SE)  | 2012 (SE)  | 2013 (SE)  | 2014 (SE) | 2015 (SE)  | 2016 (SE)  | 2017 (SE)  | 2018 (SE)  | 2019 (SE)  | 2020 (SE)  | Perc ent Change (95% CI) <sup>*,†</sup> | Joinpo int Year <sup>‡</sup> | APC Peri od 1 (95 % CI) <sup>*,§</sup> | APC Peri od 2 (95 % CI) <sup>*,§</sup> | AA PC (95 % CI) <sup>*,  </sup> |
|--------------------------|--------------------|------------|-------------|------------|------------|------------|------------|-----------|------------|------------|------------|------------|------------|------------|-----------------------------------------|------------------------------|----------------------------------------|----------------------------------------|---------------------------------|
| Less than high school    | All services       | 2.4 (0.6)  | 1.6 (0.5)   | 1.7 (0.6)  | 2.7 (1.3)  | 4.9 (1.5)  | 1.8 (0.6)  | 3.0 (1.1) | 1.5 (0.5)  | 5.2 (2.6)  | 1.7 (0.6)  | 5.4 (2.4)  | 2.8 (0.7)  | 1.9 (0.6)  | 15.2 (-62.3, 92.7)                      |                              | 4.6 (-4.2, 14.2)                       |                                        | 4.6 (-4.2, 14.2)                |
| High school              | All services       | 7.0 (1.6)  | 8.5 (1.9)   | 6.2 (1.2)  | 6.3 (1.5)  | 7.2 (2.0)  | 7.8 (1.9)  | 8.3 (1.9) | 6.1 (1.4)  | 4.9 (0.8)  | 5.5 (0.8)  | 5.9 (0.8)  | 9.8 (2.1)  | 7.6 (2.4)  | 39.4 (-46.3, 125.2)                     |                              | -0.8 (-4.7, 3.2)                       |                                        | -0.8 (-4.7, 3.2)                |
| Greater than high school | All services       | 11.4 (3.0) | 10.0 (1.6)  | 14.3 (2.8) | 18.3 (3.9) | 19.7 (5.4) | 14.2 (3.1) | 9.5 (1.8) | 12.1 (2.6) | 15.3 (4.9) | 16.7 (3.7) | 10.4 (1.8) | 18.0 (4.0) | 11.7 (1.9) | 57.4 (-47.8, 162.6)                     |                              | 1.3 (-3.5, 6.3)                        |                                        | 1.3 (-3.5, 6.3)                 |
| Race/Ethnicity           |                    |            |             |            |            |            |            |           |            |            |            |            |            |            |                                         |                              |                                        |                                        |                                 |
| Hispanic                 | Zero services      | 5.2 (3.8)  | 18.0 (11.3) | 2.0 (2.1)  | 0.0 (0.0)  | 7.4 (1.9)  | 9.1 (2.5)  | 7.4 (1.9) | 4.5 (1.2)  | 5.6 (1.6)  | 11.3 (2.9) | 13.4 (3.9) | 10.0 (3.5) | 14.6 (5.2) | 91.9 (-211.4, 395.2)                    |                              |                                        |                                        |                                 |
| Black/not Hispanic       | Zero services      | 5.3 (1.9)  | 2.7 (1.1)   | 4.1 (2.0)  | 2.6 (1.2)  | 5.2 (1.8)  | 2.4 (1.2)  | 0.3 (0.1) | 4.1 (1.8)  | 2.6 (1.3)  | 7.7 (1.8)  | 9.6 (3.0)  | 6.7 (2.2)  | 9.1 (3.2)  | 26.5 (-95.0, 147.9)                     |                              | 5.6 (-11.3, 25.6)                      |                                        | 5.6 (-11.3, 25.6)               |
| Asian/not Hispanic       | Zero services      | 0.9 (0.9)  | 2.6 (1.3)   | 1.1 (0.8)  | 0.6 (0.5)  | 6.2 (5.2)  | 1.6 (1.0)  | 3.2 (1.9) | 0.6 (0.4)  | 1.0 (0.7)  | 5.6 (2.3)  | 2.4 (1.8)  | 0.6 (0.6)  | 1.7 (1.4)  | -32.3 (-226.3, 161.7)                   |                              | 0.8 (-14.6, 18.9)                      |                                        | 0.8 (-14.6, 18.9)               |
| White/not Hispanic       | Zero services      | 5.5 (1.5)  | 6.0 (1.7)   | 2.7 (0.7)  | 3.1 (0.9)  | 2.9 (1.1)  | 1.2 (0.4)  | 1.8 (0.8) | 2.1 (1.3)  | 0.8 (0.5)  | 5.4 (1.8)  | 5.2 (1.7)  | 4.8 (1.5)  | 5.5 (2.2)  | -13.1 (-83.2, 57.1)                     |                              | -1.7 (-13.3, 11.5)                     |                                        | -1.7 (-13.3, 11.5)              |

[illegible]

|               | Number of services | 2008 (SE)  | 2009 (SE)  | 2010 (SE)  | 2011 (SE)  | 2012 (SE)  | 2013 (SE)  | 2014 (SE)  | 2015 (SE)  | 2016 (SE)  | 2017 (SE)  | 2018 (SE)   | 2019 (SE)  | 2020 (SE)  | Perc ent Change (95% CI) <sup>*,†</sup> | Joinpo int Year <sup>‡</sup> | APC Peri od 1 (95 % CI) <sup>*,§</sup> | APC Peri od 2 (95 % CI) <sup>*,§</sup> | AA PC (95 % CI) <sup>*,  </sup> |
|---------------|--------------------|------------|------------|------------|------------|------------|------------|------------|------------|------------|------------|-------------|------------|------------|-----------------------------------------|------------------------------|----------------------------------------|----------------------------------------|---------------------------------|
| Private only  | Zero services      | 3.2 (1.1)  | 2.0 (0.7)  | 2.4 (1.0)  | 3.4 (1.4)  | 1.9 (0.7)  | 0.8 (0.3)  | 3.3 (1.6)  | 2.8 (1.4)  | 2.2 (0.8)  | 4.0 (1.0)  | 2.8 (1.1)   | 5.5 (1.6)  | 3.5 (1.5)  | 71.0 (-74.5, 216.5)                     |                              | 4.6 (-4.3, 14.4)                       |                                        | 4.6 (-4.3, 14.4)                |
| Medicare only | Zero services      | 0.5 (0.2)  | 2.1 (1.5)  | 1.3 (0.6)  | 0.8 (0.4)  | 0.7 (0.3)  | 1.2 (0.5)  | 0.6 (0.3)  | 0.3 (0.2)  | 0.5 (0.2)  | 2.9 (0.9)  | 4.0 (1.6)   | 1.4 (0.5)  | 3.5 (1.0)  | 174.6 (-137.8, 487.0)                   |                              | 6.4 (-7.6, 22.5)                       |                                        | 6.4 (-7.6, 22.5)                |
| Medicaid      | Zero services      | 1.9 (1.1)  | 4.1 (2.4)  | 1.0 (0.4)  | 0.3 (0.1)  | 3.6 (1.3)  | 1.7 (0.8)  | 4.6 (1.8)  | 2.3 (1.3)  | 2.5 (1.3)  | 9.7 (3.1)  | 11.3 (3.1)  | 8.4 (2.9)  | 15.6 (5.0) | 329.6 (-215.1, 874.4)                   |                              | 19.7 (2.5, 39.7)                       |                                        | 19.7 (2.5, 39.7)                |
| Uninsured     | Zero services      | 23.2 (7.0) | 22.5 (6.4) | 9.8 (3.1)  | 10.3 (2.5) | 20.0 (4.9) | 14.7 (4.1) | 8.0 (2.8)  | 9.7 (3.2)  | 6.0 (2.2)  | 25.8 (6.8) | 39.0 (10.6) | 12.6 (5.5) | 26.0 (9.8) | -45.8 (-102.2, 10.6)                    |                              | -0.2 (-10.5, 11.3)                     |                                        | -0.2 (-10.5, 11.3)              |
| Private only  | All services       | 9.1 (2.2)  | 9.9 (2.0)  | 11.1 (2.0) | 11.4 (2.4) | 9.7 (2.0)  | 10.0 (1.6) | 8.1 (1.8)  | 7.0 (1.1)  | 10.7 (3.0) | 11.0 (2.6) | 8.6 (1.6)   | 13.6 (3.1) | 7.8 (2.2)  | 48.6 (-48.0, 145.3)                     |                              | 0.5 (-2.8, 4.0)                        |                                        | 0.5 (-2.8, 4.0)                 |
| Medicare only | All services       | 9.1 (1.6)  | 10.6 (1.4) | 10.6 (1.6) | 11.4 (1.5) | 12.9 (1.8) | 13.6 (1.7) | 13.8 (1.7) | 13.9 (1.4) | 11.9 (1.7) | 13.0 (1.6) | 13.2 (1.5)  | 19.4 (1.7) | 19.3 (3.2) | 114.4 (31.8, 197.0)                     |                              | 4.4 (2.1, 6.7)                         |                                        | 4.4 (2.1, 6.7)                  |
| Medicaid      | All services       | 2.5 (0.9)  | 1.8 (0.7)  | 1.8 (0.8)  | 4.2 (2.6)  | 2.1 (0.8)  | 4.3 (1.6)  | 3.9 (1.5)  | 1.3 (0.3)  | 1.5 (0.4)  | 2.3 (0.6)  | 2.8 (0.6)   | 2.4 (0.8)  | 3.4 (1.9)  | -4.6 (-98.0, 88.8)                      |                              | -0.7 (-8.0, 7.3)                       |                                        | -0.7 (-8.0, 7.3)                |
| Uninsured     | All services       | 1.8 (1.2)  | 0.0 (0.0)  | 0.3 (0.3)  | 0.4 (0.3)  | 1.9 (0.9)  | 1.9 (1.3)  | 0.8 (0.6)  | 1.3 (0.7)  | 1.6 (1.1)  | 0.3 (0.2)  | 0.5 (0.5)   | 0.7 (0.7)  | 0.0 (0.0)  | -62.3 (-153.0, 28.4)                    |                              |                                        |                                        |                                 |

|                      | Number of services | 2008 (SE)  | 2009 (SE)  | 2010 (SE)  | 2011 (SE)  | 2012 (SE)  | 2013 (SE)  | 2014 (SE)  | 2015 (SE)  | 2016 (SE)  | 2017 (SE)  | 2018 (SE)  | 2019 (SE)  | 2020 (SE)  | Percentage Change (95% CI) <sup>*,†</sup> | Joinpoint Year <sup>‡</sup> | APC Period 1 (95% CI) <sup>*,§</sup> | APC Period 2 (95% CI) <sup>*,§</sup> | AA PC (95% CI) <sup>*,  </sup> |
|----------------------|--------------------|------------|------------|------------|------------|------------|------------|------------|------------|------------|------------|------------|------------|------------|-------------------------------------------|-----------------------------|--------------------------------------|--------------------------------------|--------------------------------|
| Poverty income ratio |                    |            |            |            |            |            |            |            |            |            |            |            |            |            |                                           |                             |                                      |                                      |                                |
| > 400%               | Zero services      | 4.9 (2.7)  | 2.7 (1.9)  | 0.5 (0.2)  | 3.4 (1.8)  | 2.4 (1.1)  | 1.0 (0.4)  | 3.6 (2.5)  | 2.7 (2.2)  | 0.9 (0.7)  | 3.6 (1.6)  | 2.6 (1.2)  | 2.7 (1.2)  | 1.4 (0.6)  | -45.4 (-120.1, 29.2)                      |                             | 0.9 (-11.9, 15.5)                    |                                      | 0.9 (-11.9, 15.5)              |
| 200% — 399%          | Zero services      | 3.9 (1.5)  | 5.0 (2.6)  | 3.7 (1.5)  | 2.6 (1.0)  | 1.8 (0.8)  | 3.0 (1.2)  | 2.3 (0.9)  | 3.1 (1.3)  | 2.9 (1.2)  | 6.2 (2.0)  | 4.1 (1.4)  | 6.0 (2.0)  | 11.3 (3.8) | 55.2 (-96.3, 206.6)                       | 2012                        | -19.4 (-38.3, 5.2)                   | 15.3 (3.0, 29.1)                     | 1.2 (-8.4, 11.9)               |
| 100% — 199%          | Zero services      | 6.4 (2.2)  | 7.9 (2.6)  | 2.7 (1.5)  | 3.5 (1.5)  | 6.3 (2.3)  | 3.3 (1.3)  | 3.1 (1.2)  | 2.3 (0.9)  | 1.8 (0.8)  | 11.7 (3.1) | 17.3 (3.7) | 5.6 (3.1)  | 10.6 (3.4) | -13.0 (-122.9, 96.9)                      |                             | 3.3 (-9.4, 17.8)                     |                                      | 3.3 (-9.4, 17.8)               |
| < 100%               | Zero services      | 6.1 (2.2)  | 7.3 (2.4)  | 6.0 (1.9)  | 3.3 (1.2)  | 8.8 (2.1)  | 4.7 (1.9)  | 5.5 (2.0)  | 3.1 (1.2)  | 4.6 (2.1)  | 9.3 (2.3)  | 9.1 (3.2)  | 13.3 (3.7) | 13.6 (5.8) | 116.8 (-76.2, 309.8)                      |                             | 4.4 (-3.6, 13.1)                     |                                      | 4.4 (-3.6, 13.1)               |
| > 400%               | All services       | 13.1 (3.0) | 11.5 (1.7) | 14.1 (2.5) | 17.0 (3.5) | 14.1 (2.7) | 18.1 (2.7) | 14.0 (2.9) | 12.4 (1.7) | 16.6 (4.3) | 17.0 (3.5) | 14.7 (2.6) | 17.6 (4.1) | 12.6 (3.0) | 33.9 (-52.7, 120.5)                       |                             | 2.1 (-0.4, 4.7)                      |                                      | 2.1 (-0.4, 4.7)                |
| 200% — 399%          | All services       | 5.4 (2.1)  | 5.9 (1.3)  | 4.1 (0.8)  | 6.2 (1.2)  | 8.8 (2.0)  | 4.0 (0.8)  | 5.3 (1.2)  | 5.4 (1.1)  | 4.6 (0.9)  | 5.8 (1.4)  | 5.6 (1.2)  | 12.8 (3.2) | 7.5 (1.9)  | 137.9 (-80.7, 356.5)                      |                             | 3.1 (-2.8, 9.4)                      |                                      | 3.1 (-2.8, 9.4)                |
| 100% — 199%          | All services       | 4.0 (1.5)  | 7.1 (3.4)  | 7.3 (3.0)  | 5.1 (2.4)  | 3.9 (1.1)  | 4.4 (1.2)  | 5.1 (1.6)  | 3.7 (1.2)  | 3.6 (1.6)  | 3.6 (1.1)  | 3.8 (0.9)  | 4.6 (1.2)  | 2.4 (0.6)  | 14.1 (-87.9, 116.1)                       |                             | -3.7 (-7.5, 0.3)                     |                                      | -3.7 (-7.5, 0.3)               |
| < 100%               | All services       | 2.8 (1.1)  | 2.7 (1.1)  | 4.3 (1.3)  | 2.1 (0.6)  | 1.9 (0.8)  | 4.9 (1.8)  | 4.2 (1.8)  | 1.4 (0.4)  | 1.9 (0.7)  | 1.2 (0.4)  | 3.9 (0.9)  | 2.3 (0.7)  | 4.9 (3.1)  | -16.2 (-96.3, 64.0)                       |                             | -3.1 (-11.1, 5.7)                    |                                      | -3.1 (-11.1, 5.7)              |

|                                  |                   |                   |                   |                   |                   |                   |                   |                   |                   |                   |                   |                   |                   |                                                         |                                    |                                                   |                                                   |                                         |
|----------------------------------|-------------------|-------------------|-------------------|-------------------|-------------------|-------------------|-------------------|-------------------|-------------------|-------------------|-------------------|-------------------|-------------------|---------------------------------------------------------|------------------------------------|---------------------------------------------------|---------------------------------------------------|-----------------------------------------|
| Num<br>ber<br>of<br>servic<br>es | 20<br>08<br>(SE ) | 200<br>9<br>(SE ) | 20<br>10<br>(SE ) | 20<br>11<br>(SE ) | 20<br>12<br>(SE ) | 20<br>13<br>(SE ) | 20<br>14<br>(SE ) | 20<br>15<br>(SE ) | 20<br>16<br>(SE ) | 20<br>17<br>(SE ) | 201<br>8<br>(SE ) | 20<br>19<br>(SE ) | 20<br>20<br>(SE ) | Perc<br>ent<br>Chan<br>ge<br>(95%<br>CI) <sup>*,†</sup> | Joinpo<br>int<br>Year <sup>‡</sup> | APC<br>Peri<br>od 1<br>(95%<br>CI) <sup>*,§</sup> | APC<br>Peri<br>od 2<br>(95%<br>CI) <sup>*,§</sup> | AA<br>PC<br>(95%<br>CI) <sup>*,  </sup> |
|----------------------------------|-------------------|-------------------|-------------------|-------------------|-------------------|-------------------|-------------------|-------------------|-------------------|-------------------|-------------------|-------------------|-------------------|---------------------------------------------------------|------------------------------------|---------------------------------------------------|---------------------------------------------------|-----------------------------------------|

\*Values in these columns were estimated excluding data from 2020.

†Percent change: the percent change in the proportion from 2008 to 2019.

‡Years identified as Joinpoint years.

§Annual percent change: the slope of the line in each period demarcated by a Joinpoint year. If two Joinpoint years are identified, there will be three different annual percent changes. Joinpoint years are identified by permutation test, whereas the test of significance for APC is an asymptotic t-test. Due to the omnibus nature of the permutation test and the use of all the data in identifying the Joinpoints, the permutation tests are more powerful. In some cases, Joinpoint years are identified but the corresponding intervals for the APC will overlap zero due to this power difference.

||Average annual percent change: the slope of the line over the entire study period.
